1 **Phosphatidylinositol 5 phosphate 4-kinase regulates plasma-membrane PIP<sub>3</sub>**  
2 **turnover and insulin sensitivity in *Drosophila*.**

3

4

5

6

7

8 Sanjeev Sharma\*, Swarna Mathre\*^, Ramya Visvanathan\*, Dhananjay Shinde\* and Padinjat

9 Raghu\*%

10

11

12

13 \*National Centre for Biological Sciences, TIFR-GKVK Campus, Bellary Road, Bangalore 560065,

14 India.

15 ^Manipal University, Madhav Nagar, Manipal 576104, Karnataka, India

16

17

18 %corresponding author

19 Tel: +91-80-23666102

20 E-mail: [praghu@ncbs.res.in](mailto:praghu@ncbs.res.in)

21 **Abstract**

22 Phosphatidylinositol-3,4,5-trisphosphate (PIP<sub>3</sub>) generation at the plasma membrane is a key event  
23 during activation of receptor tyrosine kinases such as the insulin receptor and is critical for normal  
24 growth and metabolism. The lipid kinases and phosphatases regulating PIP<sub>3</sub> levels are described but  
25 mechanisms controlling their activity remain unclear. We report that in *Drosophila*,  
26 phosphatidylinositol 5 phosphate 4-kinase (PIP<sub>4</sub>K) function at the plasma membrane is required for  
27 normal PIP<sub>3</sub> levels during insulin receptor activation. Depletion of PIP<sub>4</sub>K increases PIP<sub>3</sub> levels and  
28 augments sensitivity to insulin through enhanced Class I phosphoinositide 3-kinase (PI3K) activity.  
29 Animals lacking PIP<sub>4</sub>K show enhanced insulin signalling dependent phenotypes *in vivo* and are  
30 resistant to the metabolic consequences of a high-sugar diet, highlighting the importance of PIP<sub>4</sub>K  
31 in normal metabolism and development. Thus, PIP<sub>4</sub>Ks are key regulators of receptor tyrosine kinase  
32 signalling with implications for growth factor dependent processes including tumour growth, T-cell  
33 activation and metabolism.

34

35

36

37

38

39

40

41

42

## 43 Introduction

44 Lipid kinases that can phosphorylate selected positions on the inositol head group of  
45 phosphatidylinositol (PI), generate second messengers that regulate multiple processes in eukaryotic  
46 cells. The generation of phosphatidylinositol 3,4,5-trisphosphate (PIP<sub>3</sub>) through the action of Class  
47 I PI<sub>3</sub>K following growth factor receptor (e.g Insulin receptor) stimulation, is a widespread signalling  
48 reaction [1] that regulates normal growth and development [2]. The role of Class I PI<sub>3</sub>K activation  
49 in response to insulin receptor signalling is evolutionarily conserved and has been widely studied in  
50 metazoan models such as the fly, worm and mammals [3]. Robust control of the levels and the  
51 dynamics of PIP<sub>3</sub> turnover is essential to maintain fidelity and sensitivity of information transfer  
52 during insulin signalling. This is achieved through a number of different molecular mechanisms.  
53 The Class I PI<sub>3</sub>K enzyme is a dimer of a catalytic subunit (p110) whose activity is inhibited under  
54 unstimulated conditions by the regulatory subunit (p85/50/55/60). Upstream receptor activation  
55 and subsequent binding to p-Tyr residues on the receptor and adaptor proteins relieves this  
56 inhibition. In addition, lipid phosphatases are also important in controlling PIP<sub>3</sub> levels at the plasma  
57 membrane. PTEN, a 3-phosphatase, hydrolyzes PIP<sub>3</sub> to produce PI(4,5)P<sub>2</sub> [4] while SHIP2 is a 5-  
58 phosphate that generates PI(3,4)P<sub>2</sub> from PIP<sub>3</sub> [5]. It is well documented that mutations in genes  
59 encoding any of these enzymes can be oncogenic or result in metabolic syndromes. Loss of function  
60 in PTEN or gain of function in Class I PI<sub>3</sub>K genes results in tumour development [6] while loss of  
61 SHIP2 results in altered insulin sensitivity in mammals [7,8]. Thus, the control of receptor-activated  
62 PIP<sub>3</sub> levels is vital to the regulation of events that direct cell growth and metabolism.

63

64 Class I PI<sub>3</sub>K enzymes utilize phosphatidylinositol 4,5-bisphosphate [PI(4,5)P<sub>2</sub>] as substrate to  
65 generate PIP<sub>3</sub>. In animal cells, the major route of PI(4,5)P<sub>2</sub> synthesis is the action of  
66 phosphatidylinositol 4 phosphate 5-kinase (PIP5K), enzymes that use phosphatidylinositol 4-  
67 phosphate (PI<sub>4</sub>P) as substrate and phosphorylate position 5 of the inositol headgroup [9]. More

68 recently, Cantley and colleagues have described a distinct class of lipid kinases, the  
69 phosphatidylinositol 5 phosphate 4-kinases (PIP4K), enzymes that utilize phosphatidylinositol 5-  
70 phosphate (PI5P) as substrate and phosphorylate position 4 to generate PI(4,5)P<sub>2</sub> [10]. Loss of  
71 PIP4Ks does not result in a drop in the mass of total cellular PI(4,5)P<sub>2</sub> but the levels of its preferred  
72 substrate, PI5P are elevated [[11], reviewed in [12]]. In mammalian cells, three isoforms of PIP4Ks  
73 occur, viz. PIP4K2A, PIP4K2B and PIP4K2C. The phenotypes of mouse knockouts in each of these  
74 genes suggest a role for PIP4Ks in regulating receptor tyrosine kinase and PI3K signaling; deletion  
75 of PIP4K2A and PIP4K2B is able to slow tumor growth in p53<sup>-/-</sup> mice [13]; depletion of PIP4K2C  
76 results in excessive T-cell activation [14] and loss of PIP4K2B in mice results in hyper-responsiveness  
77 to insulin and a progressive loss of body weight in adults [15]. Previous studies have linked PIP4K2B  
78 to insulin and PI3K signalling. Overexpression of PIP4K2B in CHO-IR cells (expressing extremely  
79 low levels of endogenous PIP4K2B) results in reduced PIP<sub>3</sub> production following insulin stimulation  
80 [16]. Similarly, in U2oS cells, acute doxycycline-induced overexpression of PIP4K2A reduces AKT  
81 activation seen on insulin stimulation although changes in PIP<sub>3</sub> levels were not reported under these  
82 conditions [17]. By contrast, a recent study has reported that in immortalized B-cells that carry a  
83 deletion of PIP4K2A, there is a reduction in PIP<sub>3</sub> levels following insulin stimulation [18]. Thus,  
84 although there are multiple lines of evidence suggesting a link between PIP4K and Class I PI3K  
85 signaling during insulin stimulation, the impact of the PIP4K function on PIP<sub>3</sub> levels remains  
86 unresolved.

87

88 It has been reported that loss of the only PIP4K in *Drosophila* results in a larval growth deficit and  
89 developmental delay. These phenotypes were associated with an overall reduction in the levels of  
90 pS6K<sup>T398</sup> and pAKT<sup>S505</sup>, both outputs of *mechanistic Target Of Rapamycin* (mTOR) signalling. The  
91 systemic growth defect in the dPIP4K mutants (*dPIP4K<sup>29</sup>*) could be rescued by enhancing mTOR  
92 complex 1 (TORC1) activity through pan-larval overexpression of its activator Rheb [11,19]. Since

93 then it has also been shown in mice that PIP4K2C can regulate TORC1 -mediated signalling in  
94 immune cells [14]. The loss of PIP4K2C was also shown to enhance TORC1 outputs in Tsc1/2  
95 deficient MEFs during starvation [20]. mTOR signalling can transduce multiple developmental and  
96 environmental cues including growth factor signalling, amino acid and cellular ATP levels into  
97 growth responses [21]. However, the relationship between PIP4K function and its role in regulating  
98 TORC1 activity and Class I PI<sub>3</sub>K signaling remains unclear.

99

100 During *Drosophila* development, larval stages are accompanied by a dramatic increase in body size.  
101 Much of this growth occurs without increases in cell number but via an increase in cellular biomass  
102 that occurs in polyploid larval tissues such as the salivary gland and fat body [22]. One major  
103 mechanism that drives this form of larval growth is the ongoing insulin signalling; characterized by  
104 the endocrine secretion of insulin-like peptides (dILPs) from insulin-producing cells (IPCs) in the  
105 larval brain and their action on peripheral tissues through the single insulin receptor in flies [23].  
106 Removal of insulin receptor (*dInR*) activity [24] or the insulin receptor substrate (*chico*) [25] results  
107 in reduced growth and delayed development through multiple mechanisms. In flies, cell size in the  
108 salivary glands can be tuned by enhancing cell-specific Class I PI<sub>3</sub>K-dependent PIP<sub>3</sub> production [26].  
109 In this study, we use salivary glands and fat body cells of *Drosophila* larvae to study the effect of  
110 dPIP4K on insulin receptor activated, Class I PI<sub>3</sub>K signalling. We find that in *Drosophila* larval  
111 salivary gland cells, loss of *dPIP4K* enhanced the growth-promoting effects of overexpressing  
112 components of the insulin signalling pathway. dPIP4K regulates the levels of PIP<sub>3</sub> and the intrinsic  
113 sensitivity to insulin at the plasma membrane. Insulin signalling activity is regulated through  
114 negative feedback from TORC1 in cells [27,28]. This TORC1 dependent reduction in insulin-  
115 stimulated PIP<sub>3</sub> production is rendered ineffective in the absence of dPIP4K. Finally, we show that  
116 these cellular changes in insulin signalling have consequences on circulating sugar metabolism in  
117 larvae and also their susceptibility to insulin resistance on a high-sugar diet. Altogether, we

118 demonstrate an important physiological role for dPIP4K as a negative regulator of Class I PI3K  
119 signaling during insulin stimulation in *Drosophila in vivo*.

120

## 121 Results

### 122 dPIP4K genetically interacts with the insulin receptor signalling pathway

123 Salivary glands are endo-replicative organs in *Drosophila* larvae that are composed of large polarized  
124 polyploid cells. Previously, we have demonstrated the use of this organ as a model to study changes  
125 in cell size [11,26]. Prior studies on insulin receptor signalling (scheme depicted in Fig. 1A) have  
126 revealed a role for this pathway in the autonomous control of both cell size and proliferation [23,25].  
127 However, direct evidence for such regulation in salivary glands has not been demonstrated.  
128 Therefore, as a proof of principle, we depleted *dInR* levels through RNA interference (RNAi)  
129 selectively in the salivary glands of 3<sup>rd</sup> instar larvae using the driver *AB1Gal4*. As expected, this  
130 resulted in a reduction of the average size of salivary gland cells without a change in the number of  
131 cells (Fig. 1B, C and S1A). Likewise, overexpression of *dInR* (Fig. 1D(i) and S1B) and *chico* (Fig. 1E(i)  
132 and S1D) selectively in the salivary glands also results in an increase in cell size. Thus, insulin  
133 receptor signalling regulates cell size in the salivary gland.

134

135 We then compared the effect of overexpressing *dInR* in wild-type and *dPIP4K<sup>29</sup>* cells. When *dInR*  
136 was over-expressed in *dPIP4K<sup>29</sup>* (*AB1>dInR; dPIP4K<sup>29</sup>*), we also found an increase in salivary gland  
137 cell size (Fig.1D(ii) and S1C); but the increase in cell size elicited was significantly greater than that  
138 seen in wild-type cells (*AB1>dInR*) (Fig. 1G). Similar results were seen when comparing the effect of  
139 *chico* overexpression in wild-type and *dPIP4K<sup>29</sup>* cells; i.e. *chico* overexpression elicited a larger  
140 increase in cell size in *dPIP4K<sup>29</sup>* compared to wild-type (Fig. 1E(ii) and Fig. S1E).

141

142 Further, in order to decipher how dPIP<sub>4</sub>K specifically interacted with the insulin signalling pathway  
143 we tested if constitutively activating a downstream step will abolish the differences between wild-  
144 type and *dPIP<sub>4</sub>K<sup>29</sup>* cells. For this, we expressed a constitutively active form of Phosphoinositide-  
145 Dependent Kinase-1 (PDK1) (PDK1<sup>A467V</sup>) which is normally activated by PIP<sub>3</sub> downstream of insulin  
146 receptor activation and regulates cell growth [29,30]. Expression of PDK1<sup>A467V</sup> in salivary glands  
147 results in an increase in cell size (Fig. 1F(i) and S1F) and this was also seen when PDK1<sup>A467V</sup> was  
148 expressed in *dPIP<sub>4</sub>K<sup>29</sup>* (Fig. 1F(ii) and S1G). However, in contrast to *dInR* and *chico* manipulations,  
149 the effect of overexpressing PDK1<sup>A467V</sup> resulted in an equivalent cell size increase in wild-type and  
150 *dPIP<sub>4</sub>K<sup>29</sup>* (Fig. 1G). These findings suggest that in *Drosophila* larval cells dPIP<sub>4</sub>K modulates insulin  
151 receptor signalling at a step likely prior to PDK1 activation.

152

### 153 PIP<sub>3</sub> levels are elevated in dPIP<sub>4</sub>K depleted larval tissues

154 An essential early event in InR signal transduction is the activation of Class I PI<sub>3</sub>K leading to the  
155 production of PIP<sub>3</sub> at the plasma membrane [1]. Therefore, we measured PIP<sub>3</sub> levels at the plasma  
156 membrane by imaging salivary glands from wandering third instar larvae expressing a PIP<sub>3</sub>-specific  
157 probe (GFP::PH-GRP1) [31]. We observed that under basal conditions, plasma membrane PIP<sub>3</sub> in  
158 *dPIP<sub>4</sub>K<sup>29</sup>* showed a small but significant elevation compared to wild-type cells (Fig. 2A(i) and (ii)).  
159 Similar results were observed in experiments with fat body cells, i.e. PIP<sub>3</sub> levels in *dPIP<sub>4</sub>K<sup>29</sup>* fat body  
160 cells were elevated compared to wild type (Fig. 2B(i) and (ii)).

161

162 During larval development in *Drosophila*, nutritional cues and other signals result in the release of  
163 *Drosophila* Insulin-like peptides (dILPs) [32] that bind to and activate dInR triggering Class I PI<sub>3</sub>K  
164 activation and PIP<sub>3</sub> production. The elevated PIP<sub>3</sub> levels observed in *dPIP<sub>4</sub>K<sup>29</sup>* tissues could,  
165 therefore, result from (i) enhanced production and release of dILPs (ii) upregulation in insulin  
166 receptor levels (iii) increase in activity of insulin receptor or events downstream of receptor

167 activation. To distinguish between these possibilities, we performed Q-PCR analysis to measure the  
168 levels of *dILP2*, *3*, *5* mRNAs [the levels of these are known to be transcriptionally regulated] [23].  
169 We found that the transcript levels for these dILPs were not upregulated in *dPIP4K<sup>29</sup>* compared to  
170 wildtype (Fig. 2C). Since these were not altered, we tested for enhanced dILP release, by measuring  
171 the levels of dILP2 within the neurosecretory insulin-producing cells (IPCs) from the brains of  
172 wandering third instar larvae. Immunoreactivity for dILP2 produced in IPCs is expected to be lower  
173 when more of it is released into the hemolymph. We found that the average intensity of dILP2  
174 immunostaining in the IPCs was not lower in *dPIP4K<sup>29</sup>* compared to controls; instead, it showed a  
175 small increase (Fig. 2E(i) and (ii)). Thus, we found no evidence of elevated production and release  
176 of dILPs in 3<sup>rd</sup> instar larvae that might explain the increased PIP<sub>3</sub> levels observed in *dPIP4K<sup>29</sup>*.  
177 Further, we observed that *InR* receptor mRNA levels were also not different between *dPIP4K<sup>29</sup>* and  
178 wildtype indicating that levels of InR that are activated by dILPs are also not likely to be different  
179 between the two genotypes (Fig. 2D). Collectively, our experiments show plasma membrane PIP<sub>3</sub>  
180 levels to be elevated in cells lacking dPIP4K without an increase in dILP secretion or cellular insulin  
181 receptor levels.

182

183 ***dPIP4K<sup>29</sup>* cells are intrinsically more sensitive to insulin stimulation.**

184 We developed *ex-vivo* assays to test the sensitivity of larval tissues to bovine insulin. It has previously  
185 been shown that *Drosophila* cells respond to bovine insulin using signal transduction elements  
186 conserved with those proposed for the canonical mammalian insulin signalling pathway [33]. We  
187 observed that in salivary glands and fat body dissected from 3<sup>rd</sup> instar larvae, *ex-vivo* insulin  
188 stimulation triggered a rise in plasma membrane PIP<sub>3</sub> levels, measured using the GFP::PH-GRP1  
189 probe. Interestingly, following insulin stimulation (10 min, 10 μM), the rise in PIP<sub>3</sub> levels in  
190 *dPIP4K<sup>29</sup>* was higher than in wild type (Fig. 3A(i), A(ii)). Selective depletion of dPIP4K protein using  
191 RNAi specifically in the salivary gland cells also produced a similar result. (Fig. 3C(i) and (ii)). The



192 increased sensitivity of *dPIP4K<sup>29</sup>* cells to *ex-vivo* insulin stimulation could be reverted by specifically  
193 reconstituting dPIP4K in salivary gland cells (Fig. 3D). Overexpression of dPIP4K in wild-type  
194 salivary gland cells resulted in reduced levels of insulin-stimulated PIP<sub>3</sub> levels (Fig. 3E). A similar  
195 observation was made in fat body cells dissected from larvae where PIP<sub>3</sub> production increased with  
196 stimulation over a wide range (100-fold) of insulin concentrations used. While 100 nM of insulin  
197 barely elicited an increase in plasma membrane PIP<sub>3</sub> levels, we observed that *dPIP4K<sup>29</sup>* fat cells show  
198 a larger rise in PIP<sub>3</sub> levels compared to the controls at higher concentrations (Fig. 3C(i)-(iii)).

199

### 200 **Quantitative measurements of PIP<sub>3</sub> mass in *Drosophila* larvae**

201 To test if the probe-based imaging of PIP<sub>3</sub> in single cells indeed reflects *in vivo* changes across the  
202 animal, we refined and adapted existing protocols [34] to perform mass spectrometric  
203 measurements of PIP<sub>3</sub> from *Drosophila* whole larval lipid extracts (Scheme depicted in Fig. 4A). The  
204 amount of PIP<sub>3</sub> that has been detected and quantified from biological samples is in the range of a few  
205 tens of picomoles [35]. We coupled liquid chromatography to high sensitivity mass spectrometry  
206 (LCMS) and used a Multiple Reaction Monitoring (MRM) method to detect PIP<sub>3</sub> standards for  
207 reliable quantification down to a few femtomoles (ca. 10 fmol, the lowest point in the figure inset on  
208 the standard curve in Fig. S2(A). Since cellular lipids are composed of molecular species with varying  
209 acyl chain lengths, we first characterized the PIP<sub>3</sub> species from *Drosophila* whole larval extracts  
210 through use of neutral loss scans and thereafter quantified the abundance of these species. Fig. S2(B)  
211 depicts the elution profiles of the different PIP<sub>3</sub> species that were reproducibly detected across  
212 samples and Fig. S3(A) shows the relative abundance of various PIP<sub>3</sub> species. The 34:2 PIP<sub>3</sub> species  
213 was found to be the most abundant. To standardize the procedure, we bisected whole larvae,  
214 stimulated them with insulin and measured the levels of various PIP<sub>3</sub> species between samples with  
215 and without insulin stimulation. Our LCMS method could clearly detect an increase in the levels of  
216 several PIP<sub>3</sub> species upon insulin stimulation (Fig. S3(B)).

217 Using this method, we compared PIP<sub>3</sub> levels from whole larval lipid extracts of various genotypes  
218 following insulin stimulation. We observed that compared to controls, *dPIP4K<sup>29</sup>* larvae showed  
219 higher PIP<sub>3</sub> levels upon insulin stimulation (Fig. 4B(i), (ii)). Similarly, upon pan-larval knockdown  
220 of dPIP4K by RNAi enhanced PIP<sub>3</sub> levels were observed following insulin stimulation (Fig. S3C(ii)  
221 and (iii)) although the differences were not as striking as seen in *dPIP4K<sup>29</sup>*; presumably this reflects  
222 the residual and variable amounts of dPIP4K protein seen during RNAi based knockdown ((Fig.  
223 S3C(i)). We also performed pan-larval rescue of dPIP4K protein in *dPIP4K<sup>29</sup>* larvae and observed a  
224 trend of rescue in levels of various PIP<sub>3</sub> species (Fig. S3D(i) and (ii)). Finally, in an alternate setting,  
225 we also depleted dPIP4K in *Drosophila* S2 cells (inset in Fig. 4C(ii)) in culture using two independent  
226 dsRNA treatments and found that on insulin stimulation of serum starved cells, the total level of  
227 PIP<sub>3</sub> was enhanced compared to that in control cells (Fig. 4C(i)); the levels of individual species of  
228 PIP<sub>3</sub> underlying this elevation broadly reflected those seen in experiments with *Drosophila* larval  
229 extracts (Fig. 4C(ii)). Together, the observations from these two independent assays (fluorescent  
230 probe based PIP<sub>3</sub> measurement and mass spectrometry) suggests that in dPIP4K depleted cells,  
231 increased amounts of PIP<sub>3</sub> are produced at the plasma membrane during insulin stimulation, thus  
232 implying that *dPIP4K* negatively regulates PIP<sub>3</sub> production.

233

#### 234 **dPIP4K directly regulates insulin receptor signalling independent of TORC1**

235 We had previously reported a systemic reduction in TORC1 activity in *dPIP4K<sup>29</sup>* larvae [11]. It is  
236 reported in mammalian cells that TORC1 activity can mediate feedback inhibition on insulin  
237 receptor substrate (IRS) to suppress insulin signalling and conversely reduced TORC1 activation can  
238 increase insulin signaling [28,36,37](Proposed feedback depicted in Fig.5 scheme 1 and 2) . We  
239 tested if the increased insulin-stimulated plasma membrane PIP<sub>3</sub> levels were a result of reduced  
240 cellular TORC1 activation in *dPIP4K<sup>29</sup>*. We down-regulated Rheb, the GTPase that directly binds  
241 and activates TORC1 [38] in the salivary gland. *AB1>Rheb<sup>RNAi</sup>* glands have substantially reduced cell

242 size consistent with the known requirement for TORC1 signalling in regulating cell size (Fig. 5A (i)).  
243 Following insulin stimulation of *AB1>Rheb<sup>RNAi</sup>* glands, PIP<sub>3</sub> levels at the plasma membrane were  
244 elevated compared to controls (Fig. 5A (ii)). Conversely, we compared PIP<sub>3</sub> production in control  
245 cells and those selectively overexpressing Rheb (*AB1>dRheb*) that is expected to enhance TORC1  
246 activity. Following insulin stimulation, the levels of PIP<sub>3</sub> generated were significantly lower in  
247 *AB1>dRheb* glands compared to controls (Fig. 5B (i), (ii)). Similarly, knockdown of TSC, the GTPase  
248 activating protein (GAP) for Rheb, expected to result in hyperactivation of Rheb [39], also reduces  
249 the PIP<sub>3</sub> levels seen post insulin stimulation (Fig. 5C (i), (ii)). These results demonstrate that TORC1  
250 output can control plasma membrane PIP<sub>3</sub> levels during insulin signaling in salivary gland cells  
251 (Fig.4 scheme 1 and 2).

252

253 We tested the effect of dPIP4K function on TORC1-mediated control of PIP<sub>3</sub> levels during insulin  
254 stimulation. When dPIP4K function is reconstituted in salivary glands (*AB1>dPIP4K; dPIP4K<sup>29</sup>*), as  
255 expected, normal levels of insulin-stimulated PIP<sub>3</sub> production were restored (refer Fig. 3D).  
256 Knockdown of *dRheb* in *dPIP4K<sup>29</sup>* salivary glands reduced the size of cells as expected (Fig. S5B(ii))  
257 but also resulted in a further elevation of insulin-stimulated PIP<sub>3</sub> levels over that seen in *dPIP4K<sup>29</sup>*  
258 (Fig. 5B(i), (ii)). However, when *dRheb* was overexpressed in *dPIP4K<sup>29</sup>* salivary glands; (*AB1>dRheb;*  
259 *dPIP4K<sup>29</sup>*), surprisingly, we found that insulin-stimulated PIP<sub>3</sub> levels were not lower than in *AB1>;*  
260 *dPIP4K<sup>29</sup>* (Fig. 5D (i), (ii)). Likewise, depletion of TSC in *dPIP4K<sup>29</sup>* (*AB1>Tsc<sup>RNAi</sup>; dPIP4K<sup>29</sup>*) did not  
261 lower insulin stimulated PIP<sub>3</sub> levels (Fig. 5F (i), (ii)). Thus, enhanced activation of TORC1 in salivary  
262 glands failed to complement the elevated PIP<sub>3</sub> levels resulting from loss of dPIP4K. Together, our  
263 findings indicate that dPIP4K function offers an additional mode of PIP<sub>3</sub> regulation that acts  
264 independent of TOR1 activity during insulin signalling.

265

266

267 **PIP<sub>4</sub>K is required at the plasma membrane to control of insulin-stimulated PIP<sub>3</sub> production**

268 We and others have previously shown that PIP<sub>4</sub>Ks localize to multiple subcellular membrane  
269 compartments [11,40]. It is also reported that the substrate for this enzyme i.e. PI5P is present on  
270 various organellar membranes inside cells [41]. To further probe the mechanism of regulation of  
271 PIP<sub>3</sub> levels by dPIP<sub>4</sub>K, we decided to identify the sub-cellular compartment at which dPIP<sub>4</sub>K  
272 function is required to regulate PIP<sub>3</sub> levels. We generated transgenic flies to target dPIP<sub>4</sub>K to specific  
273 subcellular compartments (Fig. 6A). Using unique signal sequences, we targeted dPIP<sub>4</sub>K specifically  
274 to the plasma membrane (Fig. 6B (ii)), endomembrane compartments viz. the ER and Golgi (Fig. 6B  
275 (iii)) and the lysosomes (Fig. 6B (iv)). Lysates from S2R+ cells expressing these constructs for assayed  
276 for PIP<sub>4</sub>K activity and we found that all of the targeted dPIP<sub>4</sub>K enzymes were active (Fig. 6C(i)-(ii));  
277 activity was proportional to the amount of protein expressed. Each of these targeted dPIP<sub>4</sub>K  
278 constructs were selectively reconstituted into dPIP<sub>4</sub>K null (*dPIP<sub>4</sub>K<sup>29</sup>*) cells and tested for its ability  
279 to revert the enhanced insulin-stimulated PIP<sub>3</sub> production of *dPIP<sub>4</sub>K<sup>29</sup>*. For this, we stimulated  
280 dissected salivary glands *ex-vivo* with insulin and measured PIP<sub>3</sub> production using the GFP::PH-  
281 GRP1 probe. Under these conditions, while endomembrane (Fig. 6E) and lysosome-targeted (Fig.  
282 6F) dPIP<sub>4</sub>K failed to revert the elevated PIP<sub>3</sub> levels of *dPIP<sub>4</sub>K<sup>29</sup>*, reconstitution with the plasma-  
283 membrane targeted dPIP<sub>4</sub>K completely restored the elevated PIP<sub>3</sub> levels in *dPIP<sub>4</sub>K<sup>29</sup>* to that of  
284 controls (Fig. 6D). Further, overexpression of plasma-membrane targeted dPIP<sub>4</sub>K in wildtype  
285 salivary gland cells resulted in lower insulin stimulated PIP<sub>3</sub> levels compared to the controls at 5 mins  
286 post insulin stimulation (Fig. 6G). These observations suggest that plasma membrane localized  
287 dPIP<sub>4</sub>K is sufficient to regulate insulin-stimulated PIP<sub>3</sub> production.

288

289 We also tested the ability of plasma membrane localized PIP<sub>4</sub>K to regulate steps downstream of PIP<sub>3</sub>  
290 production during insulin signalling. In a previous study, overexpression of human PIP<sub>4</sub>K2B in  
291 CHO-IR cells was shown to reduce the levels of pAKT<sup>T308</sup>, an important PIP<sub>3</sub> dependent signalling

292 event during insulin stimulation [16]. We tested the effect of overexpressing plasma membrane  
293 restricted PIP<sub>4</sub>K<sub>2</sub>B in these cells on pAKT<sup>T308</sup> during insulin stimulation. We generated a PIP<sub>4</sub>K<sub>2</sub>B  
294 construct with a CAAX-motif at its C-terminus (PIP<sub>4</sub>K<sub>2</sub>B::mCherry<sup>CAAX</sup>) that localized the enzyme  
295 to the plasma membrane as expected, while the wildtype PIP<sub>4</sub>K<sub>2</sub>B (PIP<sub>4</sub>K<sub>2</sub>B::eGFP) can be seen at  
296 various subcellular compartments (Fig. 6H(i)). CHO-IR cells transiently overexpressing either  
297 PIP<sub>4</sub>K<sub>2</sub>B::eGFP or PIP<sub>4</sub>K<sub>2</sub>B::mCherry<sup>CAAX</sup> were serum starved, stimulated with insulin and  
298 pAKT<sup>T308</sup> was measured through immunoblotting. As previously reported, we found that  
299 PIP<sub>4</sub>K<sub>2</sub>B::eGFP overexpression resulted in a small but significant decrease in pAKT<sup>T308</sup> (Fig. 6H(ii)).  
300 Interestingly, consistent with our findings in *Drosophila* larval cells, we observed that over-expressed  
301 PIP<sub>4</sub>K<sub>2</sub>B::mCherry<sup>CAAX</sup> also caused a decrease in pAKT<sup>T308</sup>. In fact, this decrease was achieved  
302 despite lower levels of expression of PIP<sub>4</sub>K<sub>2</sub>B::mCherry<sup>CAAX</sup> compared to the wildtype protein. Thus,  
303 PIP<sub>4</sub>K<sub>2</sub>B activity at the plasma membrane is sufficient to negatively regulate PIP<sub>3</sub> dependent  
304 pAKT<sup>T308</sup> levels in mammalian cells.

305

### 306 **dPIP<sub>4</sub>K alters PIP<sub>3</sub> turnover by modifying Class I PI<sub>3</sub>K activity**

307 PIP<sub>3</sub> levels at the plasma membrane upon insulin stimulation also depend on the length of time the  
308 receptor remains activated. Our 10-min stimulation protocol was based on earlier studies performed  
309 on *Drosophila* S2 cell-cultures where the response to insulin was maximal at 10 min [33]. However,  
310 in order to check for any differences in the dynamics of response to insulin, we also studied the time  
311 course of PIP<sub>3</sub> elevation following increasing times of insulin stimulation *ex-vivo*. Comparison of  
312 fixed preparations of salivary glands expressing GFP-PH-GRP1 probe showed a comparable time  
313 course of PIP<sub>3</sub> elevation but higher PIP<sub>3</sub> levels at every time point in *dPIP<sub>4</sub>K*<sup>29</sup> than in control glands  
314 (Fig. S4(i) and (ii)). To understand the effect of dPIP<sub>4</sub>K on insulin signaling at the plasma membrane  
315 with increased temporal resolution, we developed a live-imaging assay to follow the dynamics of  
316 PIP<sub>3</sub> turnover using the PH-GRP1 probe in salivary gland cells. A schematic of the reactions involved

317 in the process and the assay protocol is depicted in Fig. 7A(i) and (ii). In this assay, during insulin  
318 stimulation, the dynamics of PIP<sub>3</sub> turnover has three phases – (i) Rise phase – PIP<sub>3</sub> levels increase  
319 after a stimulus owing to the activation of PI3K and relatively lower phosphatase activity (ii) Steady-  
320 state phase – the opposing kinase and phosphatase activities regulating PIP<sub>3</sub> levels balance out each  
321 other (iii) Decay phase - PI3K activity is irreversibly inhibited by wortmannin while PIP<sub>3</sub>  
322 phosphatases remain active. A single experimental trace is shown in Fig. 7B (i); insulin stimulation  
323 triggers a rise in PIP<sub>3</sub> levels that peak and subsequently decline. Addition of wortmannin prior to  
324 addition of insulin abolished insulin stimulated PIP<sub>3</sub> production establishing the effectiveness of  
325 Class I PI3K inhibition in this assay (Fig. 7B(ii)). Under similar conditions, addition of the DMSO  
326 vehicle post insulin did not reduce PIP<sub>3</sub> levels (Fig. 7B(iii)).

327

328 We tested the effect of loss of dPIP4K and tissue-specific overexpression of dPIP4K on PIP<sub>3</sub> turnover.  
329 Loss of dPIP4K resulted in higher steady state levels of PIP<sub>3</sub> in salivary gland cells compared to  
330 controls (Fig. 7C) while overexpression of dPIP4K resulted in lower steady-state levels of PIP<sub>3</sub> (Fig.  
331 7D). These findings are consistent with the results from our imaging of PIP<sub>3</sub> levels from fixed salivary  
332 glands of these genotypes (see Fig 3 A(ii) and E). We also analyzed the rate of change in PIP<sub>3</sub> levels  
333 during the initial phase following insulin stimulation. This analysis clearly revealed an enhanced rate  
334 of PIP<sub>3</sub> production on loss of *dPIP4K*<sup>29</sup> relative to controls and a reduced rate of PIP<sub>3</sub> production in  
335 cells overexpressing this enzyme (Fig. 7E(i)). Thus, dPIP4K has the ability to modulate the rate of  
336 PIP<sub>3</sub> production during insulin stimulation. A similar analysis of the rate of decrease in PIP<sub>3</sub> levels  
337 during the phase after wortmannin addition (i.e when Class I PI3K activity has been inhibited)  
338 showed a marginally slower rate of decay in PIP<sub>3</sub> levels in both dPIP4K depleted cells relative to  
339 controls but also in cells overexpressing dPIP4K (Fig. 7E(ii)). This finding implies that while dPIP4K  
340 function is able to modulate the PIP<sub>3</sub> phosphatase activity operative during insulin signalling in  
341 *Drosophila* salivary gland cells, it has significantly greater effect on the Class I PI3K activity.

342 ***dPIP4K* function regulates sugar metabolism during larval development.**

343 We tested if increased sensitivity to insulin seen in *dPIP4K<sup>29</sup>* had any impact on the physiological  
344 response of the animals to sugar intake. It has previously been reported that larvae raised on a high  
345 sugar diet (HSD) develop an insulin resistance phenotypes reminiscent of Type II diabetes [42,43].  
346 At the level of the organism, this includes reduced body weight, a developmental delay and elevated  
347 levels of hemolymph trehalose, the main circulating sugar in insect hemolymph. As previously  
348 reported, we found that when grown on HSD (1M sucrose), wild-type larvae show ca. 9 days delay  
349 in development compared to animals grown on normal food (0.1M Sucrose) (Fig. 8A). However,  
350 interestingly, in *dPIP4K<sup>29</sup>* larvae grown on HSD a delay of only 5 days was seen compared to the  
351 same genotype grown on 0.1M sucrose (Fig. 8A). We also biochemically measured the levels of  
352 circulating trehalose in the hemolymph of wandering third instar larvae. It was observed that  
353 *dPIP4K<sup>29</sup>* larvae raised on normal food, showed circulating trehalose levels are ca. 40% lower  
354 compared to controls. Further, when wild-type animals were grown on HSD, circulating trehalose  
355 levels in larvae were elevated by ca. 25 % compared to that on normal food (Fig. 8B). However, when  
356 *dPIP4K<sup>29</sup>* larvae were raised on HSD, circulating trehalose levels remained essentially unchanged  
357 (Fig. 8B) compared to that in animals grown on normal food. Together, these observations suggest  
358 that increased insulin sensitivity occurring upon loss of *dPIP4K* confers partial protection against  
359 phenotypes that arise when larvae are challenged with a high sugar diet.

360

361 **Discussion**

362 The generation of the signalling lipid PIP<sub>3</sub>, is a conserved element of signal transduction by many  
363 growth factor receptors. The enzymes that control PIP<sub>3</sub> levels during this process, namely Class I  
364 PI3K and the lipid phosphatases PTEN and SHIP2 are well studied and the biological consequences  
365 of mutations in genes encoding these enzymes underscore the importance of tight regulation of PIP<sub>3</sub>  
366 levels during growth factor signalling. While the roles of many of the core enzymes that are directly

367 involved in PIP<sub>3</sub> metabolism have been studied extensively, the function of proteins that regulate  
368 their activity remains less understood; to date regulation of Class I PI3K activity by small GTPases  
369 (Ras, Rac) and G<sub>βγ</sub> subunits has been described [reviewed in [44]]. Although a role for PIP4K  
370 enzymes in regulating growth factor signalling through PIP<sub>3</sub> generation has been reported by earlier  
371 studies [15,16,18], the biochemical mechanism and cell-biological context in which they do so has  
372 remained obscure. PIP4Ks convert PI<sub>5</sub>P to PI(4,5)P<sub>2</sub> but to date no study has found a role for PIP4K  
373 in regulating overall cellular PI(4,5)P<sub>2</sub> levels [reviewed in [12]]. One possibility that has been raised  
374 is that PIP4Ks may generate the PI(4,5)P<sub>2</sub> pool from which PIP<sub>3</sub> is produced by Class I PI3K activity.  
375 Although PI<sub>5</sub>P, the preferred substrate of PIP4K, is a low abundance lipid, in principle, it is possible  
376 that a small, local pool of PI(4,5)P<sub>2</sub> is generated from PI<sub>5</sub>P by PIP4K and the loss of this small pool  
377 of PI(4,5)P<sub>2</sub> is not detected by the mass assays for estimating total cellular levels of this lipid.  
378 Quantitatively, based on their relative abundance, the small PIP4K generated pool of PI(4,5)P<sub>2</sub> is  
379 likely to be sufficient to serve as the substrate for PIP<sub>3</sub> generation by Class I PI3K. A recent study  
380 [18] has reported that PIP<sub>3</sub> levels are reduced in immortalized B-cells in which PIP4K2A activity is  
381 down regulated. By contrast, it has been previously reported that loss of PIP4K2B in mice results in  
382 increased levels of insulin signalling readouts such as pAKT<sup>308</sup> that are direct correlates of PIP<sub>3</sub> levels  
383 [15]. The exact reasons for these conflicting results is unclear and may include the different cell types  
384 used in each study; a key reason is likely to be the overlapping function of the three PIP4K isoforms  
385 present in mammalian genomes. In this study, we found that in *Drosophila*, that contains only a  
386 single gene encoding PIP4K activity (dPIP4K)[11,45], the levels of plasma membrane PIP<sub>3</sub> in cells  
387 lacking dPIP4K were elevated compared to controls. We established this finding using both a  
388 fluorescent reporter for plasma membrane PIP<sub>3</sub> in single cell assays using multiple cell types and also  
389 using lipid mass spectrometry across larval tissues and cultured, dPIP4K depleted *Drosophila* S2  
390 cells. Thus, our study clearly demonstrates that in *Drosophila*, dPIP4K autonomously functions as a  
391 negative regulator of PIP<sub>3</sub> production during growth factor stimulation. The elevated PIP<sub>3</sub> levels seen



392 when dPIP4K is depleted are not consistent with a role for this enzyme in generating the PI(4,5)P<sub>2</sub>  
393 at the plasma membrane used by Class I PI<sub>3</sub>K as substrate to generate PIP<sub>3</sub> during insulin signalling.  
394 Therefore, is likely that dPIP4K regulates PIP<sub>3</sub> levels through its ability to control the function of  
395 proteins that themselves regulate PIP<sub>3</sub> levels during Class I PI<sub>3</sub>K signalling.

396

397 In an earlier study [11], we had observed *dPIP4K*<sup>29</sup> larvae have systemically reduced mTOR  
398 activation. In mammalian cells, reducing mTOR activity through the use of rapamycin or a loss of  
399 S6K, a direct target of TORC1, leads to increased activation of insulin signalling and obesity  
400 resistance associated with increased insulin sensitivity [46–48]. It is also reported that S6K  
401 inactivates IRS-1 by phosphorylating it on multiple serine residues [28,36]. Therefore, it is  
402 reasonable to hypothesize a scenario where the reduced TORC1 activity in *dPIP4K*<sup>29</sup> cells may be the  
403 defect that drives the increase in the levels of PIP<sub>3</sub> in *dPIP4K*<sup>29</sup>. In wild-type larval cells, modulating  
404 TORC1 activity had expected effects on cell size (Fig. S5A(i), B(i) and C(i)) but also could tune PIP<sub>3</sub>  
405 levels during insulin stimulation (Fig. 5A, C, E ); enhancing TORC1 output resulted in lower levels  
406 of insulin-induced PIP<sub>3</sub> whereas reducing TORC1 activity caused higher levels of PIP<sub>3</sub>. By contrast,  
407 overexpression of Rheb or the down-regulation of Tsc1/2 was not able to revert the elevated plasma  
408 membrane PIP<sub>3</sub> levels in *dPIP4K*<sup>29</sup> cells (Fig. 5B, D and F) although they were able to restore the  
409 reduced cell size in *dPIP4K*<sup>29</sup> (Fig. S5A(ii) and S5C(ii)). These results imply two conclusions: 1)  
410 Decreased TORC1 activity is not sufficient to explain the enhanced PIP<sub>3</sub> levels in *dPIP4K*<sup>29</sup> larval  
411 cells and 2) Efficient feedback regulation of PIP<sub>3</sub> levels during receptor tyrosine kinase activation  
412 requires intact dPIP4K function in addition to TORC1 activity.

413

414 Binding of insulin to its receptor triggers a signalling cascade where the initial events occur at the  
415 plasma membrane. These involve interaction of the activated insulin receptor-ligand complex with  
416 IRS followed by the recruitment and activation of Class I PI<sub>3</sub>K at the plasma membrane. At which

417 sub-cellular location is dPIP<sub>4</sub>K activity required to regulate this process? Fractionation and  
418 immunolocalization studies in mammalian cells [40] and *Drosophila* [11] have indicated that PIP<sub>4</sub>K  
419 isoforms are distributed across multiple subcellular compartments including the plasma membrane,  
420 nucleus and internal vesicular compartments. In this study, using selective reconstitution of the  
421 dPIP<sub>4</sub>K to specific membrane compartments, in cells devoid of any endogenous PIP<sub>4</sub>K protein, we  
422 found that plasma membrane targeted dPIP<sub>4</sub>K could rescue the elevated PIP<sub>3</sub> levels in dPIP<sub>4</sub>K null  
423 cells. This observation strongly suggests that the plasma membrane localized dPIP<sub>4</sub>K is sufficient to  
424 control PIP<sub>3</sub> production during insulin stimulation. Our observation that *dPIP4K<sup>29</sup>* cells were  
425 hypersensitive to overexpression of *dINR* or *chico* compared to wild-type cells likely reflects the loss  
426 of a dPIP<sub>4</sub>K dependent event in the control of PIP<sub>3</sub> levels at the plasma membrane. Overexpression  
427 of plasma-membrane localized PIP<sub>4</sub>K2B was able to reduce pAKT<sup>308</sup> phosphorylation upon insulin  
428 stimulation in mammalian cells just as well as the wildtype PIP<sub>4</sub>K2B enzyme. Our finding of a role  
429 for the plasma membrane localized PIP<sub>4</sub>K in regulating PIP<sub>3</sub> levels in both *Drosophila* and  
430 mammalian cells underscores the evolutionarily conserved nature of this mechanism. Previous  
431 studies have shown that levels of PI<sub>5</sub>P, the substrate for PIP<sub>4</sub>Ks, increases upon insulin stimulation  
432 and importantly, addition of exogenous PI<sub>5</sub>P can stimulate glucose uptake in a PI<sub>3</sub>K-dependent  
433 manner [17,49]. Therefore, plasma membrane localized PIP<sub>4</sub>K and the levels of its substrate PI<sub>5</sub>P  
434 could be a mechanism by which early events during insulin signalling are regulated.

435 What molecular event involved in PIP<sub>3</sub> turnover might dPIP<sub>4</sub>K regulate at the plasma membrane?  
436 Using live cell imaging studies of PIP<sub>3</sub> turnover at the plasma membrane coupled with chemical  
437 inhibition of Class I PI<sub>3</sub>K, we were able to observe that dPIP<sub>4</sub>K function has a substantial impact on  
438 the rate of PIP<sub>3</sub> production following insulin stimulation whereas the rate of PIP<sub>3</sub> degradation was  
439 only marginally affected. This finding suggests that dPIP<sub>4</sub>K likely regulates the activity of Class I  
440 PI<sub>3</sub>K either directly or by controlling its coupling to the activated insulin receptor complex at the  
441 plasma membrane; the exact mechanism by which it does so remains to be established.

442 What might be the physiological consequence of losing dPIP4K mediated feedback control on PIP<sub>3</sub>  
443 production in the context of insulin signalling? Previous studies in mouse and human cells have  
444 reported that excessive activation of TORC1 signalling leads to inactivation of insulin signalling  
445 pathway and development of insulin resistance [50–52]. Since TORC1 activity is reduced [11] and  
446 PIP<sub>3</sub> were elevated (this study) in animals lacking dPIP4K, it is likely that loss of dPIP4K impacts  
447 sugar metabolism in *Drosophila* larvae. Using a recently reported high-sugar induced obesity and  
448 Type II diabetes-like disease model in *Drosophila* [42], we found that *dPIP4K*<sup>29</sup> larvae appear  
449 resistant to a high sugar diet as measured by the elevation in the hemolymph trehalose levels and  
450 they were relatively resistant to the developmental delay seen when wild-type larvae are reared on a  
451 high-sugar diet. This observation is reminiscent of that reported for the PIP4K2B<sup>-/-</sup> mice that have a  
452 reduced adult body weight compared to controls and clear blood glucose faster following a sugar  
453 bolus than control animals [15]. Our observation that dPIP4K at the plasma-membrane controls  
454 sensitivity to insulin receptor activation suggests a molecular basis for the physiological phenotypes  
455 observed in *dPIP4K*<sup>29</sup> larvae and PIP4K2B<sup>-/-</sup> mice. These observations also raise the possibility that  
456 inhibition of PIP4K activity may offer a route to reducing insulin resistance in the context of Type  
457 II diabetes. Such a mechanism may explain the hyperactivation of the T-cell receptor responses in  
458 mice lacking PIP4K2C [14], since the activation of Class I PI3K is a key element of T-cell receptor  
459 signal transduction. More generally, PIP4K activity likely offers a novel element of regulation for  
460 Class I PI3K activity in the context of receptor tyrosine kinase signalling.

461

462

463

464

465

466 **Materials and Methods**

467 *Drosophila* strains and rearing –

468 Unless indicated, flies were grown on standard fly medium containing corn meal, yeast extract,  
469 sucrose, glucose, agar and antifungal agents. For all experiments, crosses were setup at 25°C in  
470 vials/bottles under non-crowded conditions.

471 Fly medium composition:

| Ingredients                       | 0.1 M sucrose | 1 M sucrose |
|-----------------------------------|---------------|-------------|
| For 1 Litre                       |               |             |
| Corn flour                        | 80 g          | 80 g        |
| D-Glucose                         | 20 g          | 20 g        |
| Sugar                             | 40 g          | 342 g       |
| Agar                              | 8 g(4g)       | 8 g         |
| Yeast powder                      | 15 g          | 15 g        |
| Propionic acid                    | 4 ml          | 4 ml        |
| TEGO(Methyl parahydroxy benzoate) | 0.7 g         | 0.7 g       |
| Orthophosphoric acid              | 0.6 ml        | 0.6 ml      |

472

473 The following stocks were used in the study: wildtype strain *Red Oregon R (ROR)*, *AB1-Gal4*  
474 (Bloomington # 1824), *UAS-dInR* (Bloomington # 8262), *UAS-Rheb<sup>RNAi</sup>* (Bloomington TRiP #  
475 33966), *UAS-Rheb* (Bloomington # 9688), *UAS-TSC<sup>RNAi</sup>*(Bloomington TRiP # 52931), *P{tGPH}4*  
476 (Bloomington # 8164), *UAS-dPIP4K<sup>RNAi</sup>* (Bloomington TRiP # 65891). *UAS-dPIP4K::eGFP* and  
477 *dPIP4K<sup>29</sup>* were generated in the lab and described in [11]. For PIP<sub>3</sub> measurements in the *dPIP4K<sup>29</sup>*  
478 rescue experiment (Fig. 4F) using GFP-PH-GRP1 probe, we cloned dPIP4K cDNA (BDGP clone#

479 LD10864) into pUAST-attB between *EcoRI* and *XhoI* sites without the GFP tag. The generation of  
480 flies expressing dPIP<sub>4</sub>K::mCherry-CAAX is described in Kumari K *et.al*, 2017. For targeting  
481 dPIP<sub>4</sub>K to the endomembranes, the sequence QGSMGLPCVVM (Sato.M *et. al.*, 2006) replaced the  
482 CAAX motif in the dPIP<sub>4</sub>K::mCherry-CAAX construct. To generate Lysosomal-dPIP<sub>4</sub>K::eGFP, the  
483 39 amino-acid sequence from p18/LAMTOR (Menon S *et.al.*, 2014) was used as a signal sequence.  
484 The signal sequence was commercially synthesized with a C-terminal flag tag and introduced  
485 upstream of dPIP<sub>4</sub>K::eGFP. The entire fusion construct was cloned into pUAST-attB by GIBSON  
486 assembly using *NotI* and *XbaI* sites. All molecular constructs conceptualized and analysed further  
487 with use of the molecular cloning tools available on the free online platform – Benchling.com. All  
488 transgenic lines were generated using insertions that were performed using site-specific  
489 recombination. The level of GFP fluorescence from lysosomal-dPIP<sub>4</sub>K::eGFP was observed to be  
490 very low in the salivary glands and did not interfere with our analysis PIP<sub>3</sub> measurements using the  
491 GFP-PH-GRP1 probe in Fig. 6F. All primer sequences used for cloning the different constructs are  
492 available on request.

493

#### 494 Cell Culture, dsRNA treatment and Insulin stimulation assays –

495 CHO cell line stably expressing insulin receptor (isoform A) was a kind gift from Dr Nicholas  
496 Webster, UCSD. These were maintained at standard conditions in HF12 culture medium  
497 supplemented with 10% Fetal bovine serum and under G418 selection (400 µg/ml). Transfections  
498 were done 48 hrs. before the assay using FuGene, Promega Inc. as per manufacturer's protocols when  
499 the cultures were 50% confluent. For insulin stimulation assays, cells were starved overnight in HF12  
500 medium without serum. Thereafter, the cells were de-adhered, collected into eppendorf tubes and  
501 stimulated with 1 µM insulin for indicated times. Post stimulation, cells were spun down and  
502 immediately lysed.

503 S2R+ cells were cultured in Schneider's medium (GIBCO 21720024, HiMedia Labs IML003A)  
504 supplemented with 10% non-heat inactivated fetal bovine serum (US Origin, GIBCO 16000044) and  
505 contained antibiotics – streptomycin and penicillin (SIGMA G1146). dsRNA was synthesised in-  
506 house using Megascript RNAi Kit (Ambion, Life Technologies, AM1626) as per manufacturer's  
507 instructions. For dsRNA treatments,  $0.5 \times 10^6$  cells were seeded into a 24-well plate. Once observed  
508 to be settled, cells were incubated with incomplete medium containing 1.875  $\mu$ g of dsRNA. After 1  
509 hour, an equal amount of complete medium was added to each well. The same procedure was  
510 repeated on each well 48 hours after initial transfection after removal of the spent medium from each  
511 well. Cells were harvested by trypsinization after a total of 96 hours of dsRNA treatment. For mass  
512 spectrometric estimation of PIP<sub>3</sub>, S2R+ cells were pelleted down and stimulated with 1  $\mu$ M insulin  
513 for 10 min. The reaction was stopped by the addition of ice-cold initial organic mix (described later  
514 in the section) and used for lipid extraction. The primer sequences used for dsRNA preparation are-

|                                           |                                             |
|-------------------------------------------|---------------------------------------------|
| Ctrl (GFP)_dsRNA_Fwd                      | TAATACGACTCACTATAGGGATGGTGAGCAAGGGCGAGGAG   |
| Ctrl (GFP)_dsRNA_Rev                      | TAATACGACTCACTATAGGGCTTGTACAGCTCGTCCATGCCG  |
| PIP <sub>4</sub> K dsRNA I F (DRSC17213)  | TAATACGACTCACTATAGGGAAGTTTGATTTAAAAGGTAGCAC |
| PIP <sub>4</sub> K dsRNA I R (DRSC17213)  | TAATACGACTCACTATAGGGCTCAGCGTGTCCATTAGTTT    |
| PIP <sub>4</sub> K dsRNA II F (DRSC39291) | TAATACGACTCACTATAGGGAACATGCCGTCACATTCA      |
| PIP <sub>4</sub> K dsRNA II R (DRSC39291) | TAATACGACTCACTATAGGGGAGGTAACAGCGTTTTTCCG    |

515

#### 516 Larval growth Curve Analysis -

517 Adult flies were made to lay eggs within a span of 4-6 hrs on normal food. After 24 hrs, newly hatched  
518 first instar larvae were collected and transferred in batches of about 15-25 larvae per into vials  
519 containing either 0.1/1M Sucrose in the fly media with other components unaltered. The vials were  
520 then observed to count the number of pupae.

521

522 **Hemolymph Trehalose Measurements –**

523 The measurements were done exactly as described in [42]. In brief, hemolymph was pooled from  
524 five to eight larvae to obtain 1 µl for assay. The reagents used porcine trehalase (SIGMA, T8778) and  
525 GO kit (SIGMA, GAGO20)

526

527 **Cell size analysis in salivary glands -**

528 Salivary glands were dissected from wandering third instar larvae and fixed in 4% paraformaldehyde  
529 for 30 min at 4°C. Post fixation, glands were washed thrice with 1X PBS and incubated in BODIPY-  
530 FL-488 for 3 hours at room temperature. The glands were washed thrice in 1X PBS following which  
531 nuclei were labelled (using either DAPI or TOTO3) for 10 mins at room temperature and washed  
532 with 1X PBS again. The glands were then mounted in 70% glycerol and imaged within a day of  
533 mounting. Imaging was done on Olympus FV1000 Confocal LSM using a 20x objective. The images  
534 were then stitched into a 3D projection using an ImageJ plugin. These reconstituted 3D z-stacks  
535 were then analysed for nuclei numbers (correlate for cell number) and volume of the whole gland  
536 using Volocity Software (version 5.5.1, Perkin Elmer Inc.). The average cell size was calculated as the  
537 ratio of the average volume of the gland to the number of nuclei.

538

539 ***Ex vivo* insulin stimulation and PIP<sub>3</sub> measurements in salivary glands and fat body -**

540 For experiments with salivary glands, wandering third instar larvae were dissected one larva at a time  
541 and glands were immediately dropped into a well of a 96-well plate containing either only PBS or  
542 PBS + 10 µM Insulin (75 µl) and incubated for 10 min at RT. Following this, 25 µl of 16% PFA was  
543 added into the same well to yield a final conc. of 4% PFA. The glands were fixed in this solution for  
544 18 min at room temperature and then transferred sequentially to wells containing PBS every 10 min  
545 for 3 washes. Finally, glands were mounted in 80% glycerol in PBS containing antifade (0.4% propyl-  
546 gallate). For experiments with fat body lobes, late third instar feeding larvae were starved by placing

547 them on a filter paper soaked in 1X PBS for 2 hrs. Thereafter, the incubation, fixation and mounting  
548 steps were done exactly as described for salivary glands. Imaging was done on LSM 780 inverted  
549 confocal microscope with a 20X/0.8 NA Plan Apochromat objective. For quantification, confocal  
550 slices were manually curated to generate maximum z-projections of middle few planes of cells.  
551 Thereafter, line profiles were drawn across clearly identifiable plasma membrane regions and their  
552 adjacent cytosolic regions and ratios of mean intensities for these line profiles were calculated for  
553 each cell. For salivary glands, about 10-15 cells from multiple glands were analysed and used to  
554 generate statistics. For fat body, about 50 cells each from multiple animals were used for analysis.

555

556 For live imaging, salivary glands from wandering third instar larvae were dissected (glands from one  
557 larva imaged in one imaging run) and placed inside a drop of imaging buffer (1X PBS containing  
558 2mg/ml glucose) on a coverglass. The buffer was carefully and slowly soaked out with a paper tissue  
559 to let the glands settle and adhere to the surface. Thereafter, the glands were immediately rehydrated  
560 with 25 µl of imaging buffer. The imaging was done on Olympus FV 3000 LSM confocal system using  
561 a 10X objective. A total of 80 frames of a single plane were acquired, with 10s intervals. While  
562 imaging, 25 µl of 200µM (2X) bovine insulin was used to stimulate the glands. After the steady state  
563 was achieved, 50 µl of 800nM (2X) of wortmannin was added on top to inhibit PI3K activity.

564

565 **PIP<sub>3</sub> measurement by LC-MS/MS –**

566 The method was adopted and modified as required from [34].

567 **Lipid extraction –**

568 5 larvae were dissected in 1X PBS and transferred immediately into 37.5 µl of 1X PBS in a 2 ml  
569 Eppendorf. For insulin stimulation, to this, 37.5 µl of 100 µM Insulin (final concentration – 50 µM)  
570 was added and the tube was incubated on a mix mate shaker for 10 min at 500 rpm. At the end of  
571 incubation time, 750 µl of ice-cold 2:1 MeOH:CHCl<sub>3</sub> organic mix was added to stop the reaction.



572 Part of this solution was decanted and the rest of the mix containing larval tissues was transferred  
573 into a homogenization tube. Larval tissues were homogenized in 4 cycles of 10 secs with 30 sec  
574 intervals at 6000 rpm in a homogenizer (Precellys, Bertin Technologies). The tubes were kept on ice  
575 at all intervals. The entire homogenate was then transferred to a fresh eppendorf and the  
576 homogenization tube was then washed with the decanted mix kept aside earlier. 120 µl of water was  
577 added to the homogenate collected in eppendorf, followed by addition of 5 ng of 17:0, 20:4 PIP<sub>3</sub>  
578 internal standard (ISD). The mixture was vortexed and 725 µl of chloroform was added to it. After  
579 vortexing again for 2 min at around 1000-1500 rpm, the phases were separated by centrifugation for  
580 3 min at 1500g. 1ml of lower organic phase was removed and stored in a fresh tube. To the remaining  
581 aqueous upper phase, again 725 µl of chloroform was added. The mixture was vortexed and spun  
582 down to separate the phases. Again, 1 ml of the organic phase was collected and pooled with the  
583 previous collection (total of 2ml). This organic phase was used for measuring total organic  
584 phosphate. To the aqueous phase, 500 µl of the initial organic mix was added followed by 170 µl of  
585 2.4M HCl and 500 µl of CHCl<sub>3</sub>. This mixture was vortexed for 5 min at 1000-1500 rpm and allowed  
586 to stand at room temperature for 5 minutes. The phases were separated by centrifugation (1500g, 3  
587 min). The lower organic phase was collected into a fresh tube by piercing through the protein band  
588 sitting at the interface. To this, 708 µl of lower phase wash solution was added, the mixture was  
589 vortexed and spun down (1500g, 3 min). The resultant lower organic phase was completely taken  
590 out carefully into an Eppendorf tube and used for derivatization reaction.

591

#### 592 **Extraction solvent mixtures:**

593 Initial organic mix: MeOH/Chloroform in the ratio of 484/242 ml, Lower Phase Wash Solution:  
594 Methanol/1 M hydrochloric acid/ chloroform in a ratio of 235/245/15 ml. All ratios are expressed as  
595 vol/vol/vol.

596

597 **Derivatization of Lipids –**

598 To the organic phase of the sample, 50 µl of 2M TMS-Diazomethane was added (TO BE USED  
599 WITH ALL SAFETY PRECAUTIONS!). The reaction was allowed to proceed at room temperature  
600 for 10 min at 600 rpm. After 10 min, 10 µl of Glacial acetic acid was added to quench the reaction,  
601 vortexed briefly and spun down. 700 µl of post derivatization wash solvent was then added to the  
602 sample, vortexed (2 min, 1000-1500 rpm) and spun down. The upper aqueous phase was discarded  
603 and the wash step was repeated. To the final organic phase, 100 µl of 9:1 MeOH:H<sub>2</sub>O mix was added  
604 and the sample was dried down to about 10-15 µl in a speedvac under vacuum.

605 **Chromatographic separation and Mass spectrometric detection –**

606 The larval lipid extracts were re-suspended in 170 µl LC-MS grade methanol and 30 µl LC-MS grade  
607 water. Samples were injected as duplicate runs of 3.5 µl. Chromatographic separation was performed  
608 on an Acquity UPLC BEH<sub>300</sub> C<sub>4</sub> column (100 x 1.0 mm; 1.7 µm particle size) purchased from  
609 Waters Corporation, USA on a Waters Aquity UPLC system and detected using an ABSCIEX 6500  
610 QTRAP mass spectrometer. The flow rate was 100 µL/min. Gradients were run starting from 55%  
611 Buffer A (Water + 0.1% Formic Acid)- 45% Buffer B (Acetonitrile + 0.1% Formic acid) to 42% B  
612 from 0-5 min; thereafter 45% B to 100% B from 5-10 min; 100% B was held from 10-15 min; brought  
613 down from 100% B to 45% B between 15-16 min and held there till 20th min to re-equilibrate the  
614 column. On the mass spectrometer, in pilot standardization experiments, we first employed Neutral  
615 Loss Scans on biological samples to look for parent ions that would lose neutral fragments of 598  
616 a.m.u indicative of PIP<sub>3</sub> lipid species (as described in [34]). Thereafter, these PIP<sub>3</sub> species were  
617 quantified in biological samples using the selective Multiple Reaction Monitoring (MRM) method  
618 in the positive mode. Only those MRM transitions that showed an increase upon insulin stimulation  
619 of biological samples were used for the final experiments (depicted in figure S3B). The MRM  
620 transitions for the different PIP<sub>3</sub> species quantified are listed out in the table below. Area of all the  
621 peaks was calculated on Sciex MultiQuant software. The area of the internal standard peak was used

622 to normalize for lipid recovery during extraction. The normalized for each of the species was then  
 623 divided by the amount of organic phosphate measured in each of the biological samples. The other  
 624 mass spectrometer parameters are as follows: ESI voltage: +4500V; Dwell time: 40 ms ; DP (De-  
 625 clustering Potential): 35.0 V; EP: (Entrance Potential): 10.1 V, CE (Collision Energy): 47.0 V; CXP  
 626 (Collision cell Exit Potential): 11.6 V, Source Temperature : 450 C, Ion Spray Voltage – 4000 V,  
 627 Curtain Gas : 35.0, GS1: 15, GS2: 16. The area under the peaks was extracted using MultiQuant v1.1  
 628 software (ABSCIEX). Numerical analysis was done in Microsoft Excel.

|                 | Sample                   |            |              |                          |            |              |
|-----------------|--------------------------|------------|--------------|--------------------------|------------|--------------|
|                 | Drosophila Larvae        |            |              | S2R+ cells               |            |              |
|                 | PIP <sub>3</sub> species | Parent Ion | Daughter Ion | PIP <sub>3</sub> species | Parent Ion | Daughter Ion |
| MRM Transitions | 32_1                     | 1145.5     | 547.5        | 30_1                     | 1119.5     | 521.5        |
|                 | 32_2                     | 1177.5     | 579.5        | 32_0                     | 1149.5     | 551.5        |
|                 | 34_1                     | 1175.5     | 577.5        | 32_1                     | 1147.5     | 549.5        |
|                 | 34_2                     | 1173.5     | 575.5        | 32_2                     | 1145.5     | 547.5        |
|                 | 34_3                     | 1171.5     | 573.5        | 34_0                     | 1177.5     | 579.5        |
|                 | 36_1                     | 1203.5     | 605.5        | 34_1                     | 1175.5     | 577.5        |
|                 | 36_2                     | 1201.5     | 603.5        | 34_2                     | 1173.5     | 575.5        |
|                 | 36_3                     | 1199.5     | 601.5        | 34_3                     | 1171.5     | 573.5        |
|                 | 36_4                     | 1197.5     | 599.5        | 34_4                     | 1169.5     | 571.5        |
|                 |                          |            |              | 34_5                     | 1167.5     | 569.5        |
|                 |                          |            |              | 36_2                     | 1201.5     | 603.5        |
|                 |                          |            |              | 36_3                     | 1199.5     | 601.5        |
|                 |                          |            |              | 36_4                     | 1197.5     | 599.5        |
|                 |                          |            |              | 36_5                     | 1195.5     | 597.5        |
|                 |                          |            |              | 38_3                     | 1227.5     | 629.5        |

|  |  |  |  |          |        |       |
|--|--|--|--|----------|--------|-------|
|  |  |  |  | 38_4     | 1225.5 | 627.5 |
|  |  |  |  | 38_5     | 1223.5 | 625.5 |
|  |  |  |  | 37_4 ISD | 1211.5 | 613.5 |

629

#### 630 Total Organic Phosphate measurement–

631 1 ml of the organic phase from each sample was taken into phosphate-free tubes and dried  
632 completely at 90°C. The remaining steps were performed as described in *Thakur et.al., 2016*.

633

#### 634 Preparation of S2R+ cell lysate for *in vitro* PI<sub>5</sub>P<sub>4</sub>-kinase assay

635 The S2R+ cells were pelleted at 1000g for 10 min and washed with ice-cold PBS Twice. Cells were  
636 thereafter homogenized in lysis buffer containing 50mM Tris-Cl, pH – 7.5, 1mM EDTA, 1mM  
637 EGTA, 1% Triton-X-100, 50mM NaF, 0.27 M Sucrose, 0.1% β- Mercaptoethanol and freshly added  
638 protease and phosphatase inhibitors (Roche). The lysate was then centrifuged at 1000g for 15 min at  
639 4 °C. Protein estimation was performed using the Bradford reagent according to the manufacturer's  
640 instructions.

641

#### 642 PI<sub>5</sub>P<sub>4</sub>-kinase Assay

643 Vacuum-dried substrate lipid (6 μM PI<sub>5</sub>P) and 20 μM of phosphatidylserine were resuspended in  
644 10 mM Tris pH 7.4 and micelles were formed by sonication for 2 min in a bath-sonicator. 50 μl of  
645 2× PIPkinase reaction buffer (100 mM Tris pH 7.4, 20 mM MgCl<sub>2</sub>, 140 mM KCl, and 2 mM EGTA)  
646 containing 20 μM ATP, 5 μCi [γ-<sup>32</sup>P] ATP and cell lysates containing ~10 μg total protein was added  
647 to the micelles. The reaction mixture was incubated at 30 °C for 16 h. Lipids were extracted and  
648 resolved by one dimensional TLC (45:35:8:2 chloroform: methanol: water: 25% ammonia). The  
649 resolved lipids were imaged using phosphorImager.

650

651 **Western Blotting –**

652 For larval western blots, lysates were prepared by homogenizing 3 wandering third instar larvae or  
653 5 pairs of salivary glands from third instar larvae. In the case of CHO-IR cells, pelleted cells were  
654 lysed by repeated pipetting in lysis buffer (same as described above). Thereafter, the samples were  
655 heated at 95°C with Laemli loading buffer for 5 min and loaded onto an SDS- Polyacrylamide gel.  
656 The proteins were subsequently transferred onto a nitrocellulose membrane and incubated with  
657 indicated antibodies overnight at 4°C (for actin/tubulin incubation was done at room temperature  
658 for 3 hrs.). Primary antibody concentrations used were – anti-  $\alpha$ -actin (SIGMA A5060) 1:1000; anti-  
659 dPIP4K 1:1000, anti – GAPDH (Novus Biologicals, #IM-5143A), anti-PIP4KB (Cell Signaling,  
660 #9694), anti – pAKT308 (Cell Signaling, #9275), anti-AKT (Cell Signaling, # 9272). The blots were  
661 then washed thrice with Tris Buffer Saline containing 0.1% Tween-20 (0.1% TBS-T) and incubated  
662 with 1:10000 concentration of appropriate HRP-conjugated secondary antibodies (Jackson  
663 Laboratories, Inc.) for 1.5 hrs. After three washes with 0.1% TBS-T, blots were developed using  
664 Clarity Western ECL substrate on a GE ImageQuant LAS 4000 system.

665 **Acknowledgements**

666 This work was supported by the National Centre for Biological Sciences, TIFR, Department of  
667 Biotechnology, Ministry of Science and Technology (India); and a Wellcome Trust-DBT India  
668 Alliance Senior Fellowship to PR. S.S is a recipient of the S.P Mukherji Fellowship from CSIR and  
669 S.M an ICMR Fellowship. We thank the NCBS *Drosophila*, Imaging and Lipidomics Facility for  
670 support.

671

672

673

674

675

## 676 References

- 677 1. Hawkins PT, Anderson KE, Davidson K, Stephens LR. Signalling through Class I PI<sub>3</sub>Ks in  
678 mammalian cells. *Biochem Soc Trans.* 2006;34: 647–62. doi:10.1042/BST0340647
- 679 2. Engelman JA, Luo J, Cantley LC. The evolution of phosphatidylinositol 3-kinases as  
680 regulators of growth and metabolism. 2006;7: 606–619. Available:  
681 [http://www.ncbi.nlm.nih.gov/entrez/query.fcgi?cmd=Retrieve&db=PubMed&dopt=Citatio](http://www.ncbi.nlm.nih.gov/entrez/query.fcgi?cmd=Retrieve&db=PubMed&dopt=Citation&list_uids=16847462)  
682 [n&list\\_uids=16847462](http://www.ncbi.nlm.nih.gov/entrez/query.fcgi?cmd=Retrieve&db=PubMed&dopt=Citation&list_uids=16847462)
- 683 3. Barbieri M, Bonafe M, Franceschi C, Paolisso G, Bonafè M, Franceschi C, et al. Insulin/IGF-  
684 I-signaling pathway: an evolutionarily conserved mechanism of longevity from yeast to  
685 humans. *Am J Physiol Endocrinol Metab.* 2003;285: 1064–1071.  
686 doi:doi:10.1152/ajpendo.00296.2003
- 687 4. McConnachie G, Pass I, Walker SM, Downes CP. Interfacial kinetic analysis of the tumour  
688 suppressor phosphatase, PTEN: evidence for activation by anionic phospholipids. *Biochem*  
689 *J.* 2003;371: 947–955. doi:10.1042/bj20021848
- 690 5. Pesesse X, Moreau C, Drayer AL, Woscholski R, Parker P, Erneux C. The SH<sub>2</sub> domain  
691 containing inositol 5-phosphatase SHIP<sub>2</sub> displays phosphatidylinositol 3,4,5-trisphosphate  
692 and inositol 1,3,4,5-tetrakisphosphate 5-phosphatase activity. *FEBS Lett.* 1998;437: 301–303.  
693 doi:10.1016/S0014-5793(98)01255-1
- 694 6. Luo J, Manning BD, Cantley LC. Targeting the PI<sub>3</sub>K-Akt pathway in human cancer: rationale  
695 and promise. *Cancer Cell.* 2003;4: 257–62. Available:  
696 <http://www.ncbi.nlm.nih.gov/pubmed/14585353>
- 697 7. Kaisaki PJ, Delépine M, Woon PY, Sebag-Montefiore L, Wilder SP, Menzel S, et al.  
698 Polymorphisms in type II SH<sub>2</sub> domain-containing inositol 5-phosphatase (INPPL<sub>1</sub>, SHIP<sub>2</sub>)  
699 are associated with physiological abnormalities of the metabolic syndrome. *Diabetes.*  
700 2004;53: 1900–4. Available: <http://www.ncbi.nlm.nih.gov/pubmed/15220217>

- 701 8. Clément S, Krause U, Desmedt F, Tanti JF, Behrends J, Pesesse X, et al. The lipid phosphatase  
702 SHIP2 controls insulin sensitivity. *Nature*. 2001;409: 92–7. doi:10.1038/35051094
- 703 9. Stephens LR, Hughes KT, Irvine RF. Pathway of phosphatidylinositol(3,4,5)-trisphosphate  
704 synthesis in activated neutrophils. *Nature*. 1991;351: 33–9. doi:10.1038/351033a0
- 705 10. Rameh LE, Toliás KF, Duckworth BC, Cantley LC. A new pathway for synthesis of  
706 phosphatidylinositol-4,5-bisphosphate. *Nature*. 1997;390: 192–196.
- 707 11. Gupta A, Toscano S, Trivedi D, Jones DR, Mathre S, Clarke JH, et al. Phosphatidylinositol 5-  
708 phosphate 4-kinase (PIP4K) regulates TOR signaling and cell growth during *Drosophila*  
709 development. *Proc Natl Acad Sci U S A*. 2013;110: 5963–5968. doi:10.1073/pnas.1219333110
- 710 12. Kolay S, Basu U, Raghu P. Control of diverse subcellular processes by a single multi-  
711 functional lipid phosphatidylinositol 4,5-bisphosphate [PI(4,5)P<sub>2</sub>]. *Biochem J*. 2016;473:  
712 1681–92. doi:10.1042/BCJ20160069
- 713 13. Emerling BM, Hurov JB, Poulogiannis G, Tsukazawa KS, Choo-Wing R, Wulf GM, et al.  
714 Depletion of a putatively druggable class of phosphatidylinositol kinases inhibits growth of  
715 p53-Null tumors. *Cell*. Elsevier; 2013;155: 844–857. doi:10.1016/j.cell.2013.09.057
- 716 14. Shim H, Wu C, Ramsamoj S, Bosch KN, Chen Z, Emerling BM, et al. Deletion of the gene  
717 *Pip4k2c*, a novel phosphatidylinositol kinase, results in hyperactivation of the immune  
718 system. *Proc Natl Acad Sci*. 2016;113: 7596–7601. doi:10.1073/pnas.1600934113
- 719 15. Lamia KA, Peroni OD, Kim YB, Rameh LE, Kahn BB, Cantley LC. Increased insulin  
720 sensitivity and reduced adiposity in phosphatidylinositol 5-phosphate 4-kinase beta<sup>-/-</sup> mice.  
721 *Mol Cell Biol*. 2004/05/15. 2004;24: 5080–5087. doi:10.1128/MCB.24.11.5080-5087.2004  
722 24/11/5080 [pii]
- 723 16. Carricaburu V, Lamia KA, Lo E, Favereaux L, Payrastré B, Cantley LC, et al. The  
724 phosphatidylinositol (PI)-5-phosphate 4-kinase type II enzyme controls insulin signaling by  
725 regulating PI-3,4,5-trisphosphate degradation. *Proc Natl Acad Sci*. 2003;100: 9867–9872.

- 726           doi:10.1073/pnas.1734038100
- 727   17.   Jones DR, Foulger R, Keune W-J, Bultsma Y, Divecha N. PtdIns5P is an oxidative stress-  
728           induced second messenger that regulates PKB activation. *FASEB J.* 2013;27: 1644–56.  
729           doi:10.1096/fj.12-218842
- 730   18.   Bulley SJ, Droubi A, Clarke JH, Anderson KE, Stephens LR, Hawkins PT, et al. In B cells,  
731           phosphatidylinositol 5-phosphate 4-kinase- $\alpha$  synthesizes PI(4,5)P<sub>2</sub> to impact mTORC2 and  
732           Akt signaling. *Proc Natl Acad Sci.* 2016;113: 10571–10576. doi:10.1073/pnas.1522478113
- 733   19.   Durán R V, Hall MN. Regulation of TOR by small GTPases. *EMBO Rep.* 2012;13: 121–8.  
734           doi:10.1038/embor.2011.257
- 735   20.   Mackey AM, Sarkes DA, Bettencourt I, Asara JM, Rameh LE. PIP4k is a substrate for  
736           mTORC1 that maintains basal mTORC1 signaling during starvation. *Sci Signal.* 2014;7:  
737           ra104-ra104. doi:10.1126/scisignal.2005191
- 738   21.   Wullschleger S, Loewith R, Hall MN. TOR signaling in growth and metabolism. *Cell.*  
739           2006;124: 471–84. doi:10.1016/j.cell.2006.01.016
- 740   22.   Church RB, Robertson FW. Biochemical analysis of genetic differences in the growth of  
741           Drosophila.           1966/06/01.           1966;7:           383–407.           Available:  
742           [http://www.ncbi.nlm.nih.gov/entrez/query.fcgi?cmd=Retrieve&db=PubMed&dopt=Citation](http://www.ncbi.nlm.nih.gov/entrez/query.fcgi?cmd=Retrieve&db=PubMed&dopt=Citation&list_uids=5940873)  
743           &list\_uids=5940873
- 744   23.   Brogiolo W, Stocker H, Ikeya T, Rintelen F, Fernandez R, Hafen E. An evolutionarily  
745           conserved function of the Drosophila insulin receptor and insulin-like peptides in growth  
746           control.           *Curr Biol.*           2001;11:           213–21.           Available:  
747           <http://www.ncbi.nlm.nih.gov/pubmed/11250149>
- 748   24.   Shingleton AW, Das J, Vinicius L, Stern DL. The temporal requirements for insulin signaling  
749           during development in Drosophila. Johnston L, editor. *PLoS Biol.* 2005;3: e289.  
750           doi:10.1371/journal.pbio.0030289



- 751 25. Bohni R, Riesgo-Escovar J, Oldham S, Brogiolo W, Stocker H, Andruss BF, et al. Autonomous  
752 control of cell and organ size by CHICO, a Drosophila homolog of vertebrate IRS1-4.  
753 1999;97: 865–875. Available:  
754 [http://www.ncbi.nlm.nih.gov/entrez/query.fcgi?cmd=Retrieve&db=PubMed&dopt=Citatio](http://www.ncbi.nlm.nih.gov/entrez/query.fcgi?cmd=Retrieve&db=PubMed&dopt=Citation&list_uids=10399915)  
755 [n&list\\_uids=10399915](http://www.ncbi.nlm.nih.gov/entrez/query.fcgi?cmd=Retrieve&db=PubMed&dopt=Citation&list_uids=10399915)
- 756 26. Georgiev P, Okkenhaug H, Drews A, Wright D, Lambert S, Flick M, et al. TRPM channels  
757 mediate zinc homeostasis and cellular growth during Drosophila larval development. *Cell*  
758 *Metab.* 2010;12: 386–97. doi:10.1016/j.cmet.2010.08.012
- 759 27. Kockel L, Kerr KS, Melnick M, Brückner K, Hebrok M, Perrimon N. Dynamic switch of  
760 negative feedback regulation in Drosophila Akt-TOR signaling. *PLoS Genet.* 2010;6: 1–17.  
761 doi:10.1371/journal.pgen.1000990
- 762 28. Gual P, Le Marchand-Brustel Y, Tanti J-F. Positive and negative regulation of insulin  
763 signaling through IRS-1 phosphorylation. *Biochimie.* 2005;87: 99–109.  
764 doi:10.1016/j.biochi.2004.10.019
- 765 29. Rintelen F, Stocker H, Thomas G, Hafen E. PDK1 regulates growth through Akt and S6K in  
766 Drosophila. *Proc Natl Acad Sci U S A.* 2001;98: 15020–5. doi:10.1073/pnas.0111318098
- 767 30. Paradis S, Ailion M, Toker A, Thomas JH, Ruvkun G. A PDK1 homolog is necessary and  
768 sufficient to transduce AGE-1 PI3 kinase signals that regulate diapause in *Caenorhabditis*  
769 *elegans.* *Genes Dev.* 1999;13: 1438–52. Available:  
770 <http://www.ncbi.nlm.nih.gov/pubmed/10364160>
- 771 31. Britton JS, Lockwood WK, Li L, Cohen SM, Edgar BA. Drosophila’s insulin/PI3-kinase  
772 pathway coordinates cellular metabolism with nutritional conditions. 2002;2: 239–249.  
773 Available:  
774 [http://www.ncbi.nlm.nih.gov/entrez/query.fcgi?cmd=Retrieve&db=PubMed&dopt=Citatio](http://www.ncbi.nlm.nih.gov/entrez/query.fcgi?cmd=Retrieve&db=PubMed&dopt=Citation&list_uids=11832249)  
775 [n&list\\_uids=11832249](http://www.ncbi.nlm.nih.gov/entrez/query.fcgi?cmd=Retrieve&db=PubMed&dopt=Citation&list_uids=11832249)

- 776 32. Nässel DR, Broeck J Vanden. Insulin/IGF signaling in *Drosophila* and other insects: factors  
777 that regulate production, release and post-release action of the insulin-like peptides. *Cell Mol*  
778 *Life Sci.* 2016;73: 271–290. doi:10.1007/s00018-015-2063-3
- 779 33. Lizcano JM, Alrubaie S, Kieloch A, Deak M, Leever SJ, Alessi DR. Insulin-induced  
780 *Drosophila* S6 kinase activation requires phosphoinositide 3-kinase and protein kinase B.  
781 *Biochem J.* 2003;374: 297–306. doi:10.1042/BJ20030577
- 782 34. Clark J, Anderson KE, Juvin V, Smith TS, Karpe F, Wakelam MJO, et al. Quantification of  
783 PtdInsP<sub>3</sub> molecular species in cells and tissues by mass spectrometry. *Nat Methods. Nature*  
784 *Publishing Group;* 2011;8: 267–272. doi:10.1038/nmeth.1564
- 785 35. Malek M, Kielkowska A, Chessa T, Anderson KE, Barneda D, Pir P, et al. PTEN Regulates  
786 PI(3,4)P<sub>2</sub> Signaling Downstream of Class I PI3K. *Mol Cell.* 2017;68: 566–580.e10.  
787 doi:10.1016/j.molcel.2017.09.024
- 788 36. Tremblay F, Brûlé S, Hee Um S, Li Y, Masuda K, Roden M, et al. Identification of IRS-1 Ser-  
789 1101 as a target of S6K1 in nutrient- and obesity-induced insulin resistance. *Proc Natl Acad*  
790 *Sci U S A.* 2007;104: 14056–14061. doi:10.1073/pnas.0706517104
- 791 37. Zick Y. Insulin resistance: A phosphorylation-based uncoupling of insulin signaling. *Trends*  
792 *Cell Biol.* 2001;11: 437–441. doi:10.1016/S0962-8924(01)02129-8
- 793 38. Tee AR, Manning BD, Roux PP, Cantley LC, Blenis J. Tuberous sclerosis complex gene  
794 products, Tuberin and Hamartin, control mTOR signaling by acting as a GTPase-activating  
795 protein complex toward Rheb. *Curr Biol.* 2003;13: 1259–68. Available:  
796 <http://www.ncbi.nlm.nih.gov/pubmed/12906785>
- 797 39. Zhang Y, Gao X, Saucedo LJ, Ru B, Edgar B a, Pan D. Rheb is a direct target of the tuberous  
798 sclerosis tumour suppressor proteins. *Nat Cell Biol.* 2003;5: 578–81. doi:10.1038/ncb999
- 799 40. Clarke JH, Wang M, Irvine RF. Localization, regulation and function of type II  
800 phosphatidylinositol 5-phosphate 4-kinases. *Adv Enzyme Regul. Elsevier Ltd;* 2010;50: 12–

- 801 18. doi:10.1016/j.advenzreg.2009.10.006
- 802 41. Sarkes D, Rameh LE. A novel HPLC-based approach makes possible the spatial  
803 characterization of cellular PtdIns5P and other phosphoinositides. *Biochem J.* 2010;428: 375–  
804 84. doi:10.1042/BJ20100129
- 805 42. Palanker Musselman L, Fink JL, Narzinski K, Ramachandran P V., Sukumar Hathiramani S,  
806 Cagan RL, et al. A high-sugar diet produces obesity and insulin resistance in wild-type  
807 *Drosophila*. *Dis Model Mech.* 2011;4: 842–849. doi:10.1242/dmm.007948
- 808 43. Pasco MY, Léopold P. High sugar-induced insulin resistance in *Drosophila* relies on the  
809 Lipocalin Neural Lazarillo. *PLoS One.* 2012;7: 1–8. doi:10.1371/journal.pone.0036583
- 810 44. Hawkins PT, Stephens LR. PI3K signalling in inflammation. *Biochim Biophys Acta - Mol Cell*  
811 *Biol Lipids.* 2015;1851: 882–897. doi:10.1016/j.bbalip.2014.12.006
- 812 45. Balakrishnan SS, Basu U, Raghu P. Phosphoinositide signalling in *Drosophila*. *Biochim*  
813 *Biophys Acta - Mol Cell Biol Lipids.* 2015;1851: 770–784. doi:10.1016/j.bbalip.2014.10.010
- 814 46. Reilly KEO, Rojo F, She Q, Solit D, Mills GB, Lane H, et al. mTOR Inhibition Induces  
815 Upstream Receptor Tyrosine Kinase Signaling and Activates Akt. *Cancer Res.* 2011;66: 1500–  
816 1508. doi:10.1158/0008-5472.CAN-05-2925.mTOR
- 817 47. Um SH, Frigerio F, Watanabe M, Picard F, Joaquin M, Sticker M, et al. Absence of S6K1  
818 protects against age- and diet-induced obesity while enhancing insulin sensitivity. *Nature.*  
819 2004;431: 200–205. doi:10.1038/nature02979
- 820 48. Haruta T, Uno T, Kawahara J, Takano A, Egawa K, Sharma PM, et al. A Rapamycin-Sensitive  
821 Pathway Down-Regulates Insulin Signaling via Phosphorylation and Proteasomal  
822 Degradation of Insulin Receptor Substrate-1. *Mol Endocrinol.* 2000; 783–794.  
823 doi:10.1210/mend.14.6.0446
- 824 49. Grainger DL, Tavelis C, Ryan AJ, Hinchliffe K a. Involvement of phosphatidylinositol 5-  
825 phosphate in insulin-stimulated glucose uptake in the L6 myotube model of skeletal muscle.

- 826 Pflugers Arch. 2011;462: 723–32. doi:10.1007/s00424-011-1008-4
- 827 50. Harrington LS, Findlay GM, Gray A, Tolkacheva T, Wigfield S, Rebholz H, et al. The TSC1-  
828 2 tumor suppressor controls insulin-PI3K signaling via regulation of IRS proteins. J Cell Biol.  
829 2004;166: 213–23. doi:10.1083/jcb.200403069
- 830 51. Shah OJ, Wang Z, Hunter T. Inappropriate Activation of the TSC/Rheb/mTOR/S6K Cassette  
831 Induces IRS1/2 Depletion, Insulin Resistance, and Cell Survival Deficiencies. Curr Biol.  
832 2004;14: 1650–1656. doi:10.1016/j.cub.2004.08.026
- 833 52. Tzatsos A, Kandror K V. Nutrients suppress phosphatidylinositol 3-kinase/Akt signaling via  
834 raptor-dependent mTOR-mediated insulin receptor substrate 1 phosphorylation. Mol Cell  
835 Biol. 2006;26: 63–76. doi:10.1128/MCB.26.1.63-76.2006
- 836
- 837
- 838
- 839
- 840
- 841
- 842
- 843
- 844
- 845
- 846

847 **Figure Legends:**

848 **Fig. 1. dPIP<sub>4</sub>K epistatically interacts with insulin receptor signalling to modulate cell size**

849 A. Schematic depicting the components of insulin signalling cascade studied in the subsequent  
850 experiments. B-G. Salivary gland cell size measurements. B. Cell sizes upon knockdown of Insulin  
851 receptor in salivary glands. C. Quantification of the no. of nuclei. Whiskers in the box plots represent  
852 minimum and maximum values, with a line at the median. Cell size measurements in wildtype  
853 (*ROR*) and *dPIP<sub>4</sub>K<sup>29</sup>* backgrounds as indicated upon - D. Overexpression of insulin receptor (*InR*)  
854 E. Overexpression of insulin receptor substrate - Chico F. Overexpression of PDK1<sup>A467V</sup> G. Table  
855 with differences in median values of cell sizes across different genetic manipulations. Numbers inside  
856 the parentheses below the plots indicate the no. of biological replicates used for the measurement.  
857 *Mann Whitney test* used for statistical analysis of the distributions. \*\**p-value* <0.01, \*\*\**p-value*  
858 <0.001. Genotypes: B, C. *AB<sub>1</sub>Gal4/+ and AB<sub>1</sub>Gal4; UAS-dINR<sup>RNAi</sup>*. D(i). *AB<sub>1</sub>Gal4/+ and UAS-*  
859 *dINR/+; AB<sub>1</sub>Gal4/+ and (ii). AB<sub>1</sub>Gal4/+; dPIP<sub>4</sub>K<sup>29</sup> and UAS-dINR/+; AB<sub>1</sub>Gal4/+; dPIP<sub>4</sub>K<sup>29</sup>*. E(i).  
860 *AB<sub>1</sub>Gal4/+ and UAS-Chico/+; AB<sub>1</sub>Gal4/+ and (ii). AB<sub>1</sub>Gal4/+; dPIP<sub>4</sub>K<sup>29</sup> and UAS-Chico/+;*  
861 *AB<sub>1</sub>Gal4/+; dPIP<sub>4</sub>K<sup>29</sup>*. F(i). *AB<sub>1</sub>Gal4/+ and UAS-PDK<sup>A467V</sup>/+; AB<sub>1</sub>Gal4/+ and (ii). AB<sub>1</sub>Gal4/+;*  
862 *dPIP<sub>4</sub>K<sup>29</sup> and UAS-PDK<sup>A467V</sup>/+; AB<sub>1</sub>Gal4/+; dPIP<sub>4</sub>K<sup>29</sup>*.

863

864 **Fig. 2. Plasma membrane PIP<sub>3</sub> levels are elevated in dPIP<sub>4</sub>K mutant tissues without an increase in**  
865 **humoral dILP secretion**

866 A-B. PIP<sub>3</sub> quantification – Images showing the intensity and localization of the PIP<sub>3</sub> binding probe  
867 (GFP-PH-GRP1) in larval tissues. The PIP<sub>3</sub> levels quantified as the ratio of the probe fluorescence  
868 intensity on the plasma membrane to that in the cytosol. A(i). Representative confocal images  
869 showing the distribution of the probe in the salivary glands. A(ii). Quantification of PIP<sub>3</sub> levels  
870 between control and *dPIP<sub>4</sub>K<sup>29</sup>* salivary glands for experiment depicted in A(i). (Mean fluorescence  
871 intensity ratios calculated from a minimum of 10 cells from each salivary gland). B(i). Representative

872 confocal images showing the distribution of the probe in the fat body and in B(ii) the quantification  
873 from these experiments. The ratio was calculated from about 50 cells from 12 fat body regions pooled  
874 from 5 animals for each genotype respectively. Wandering third instar larvae used for  
875 measurements. Scale: 50  $\mu\text{m}$  for salivary gland images and 10  $\mu\text{m}$  for fat body images C. qPCR  
876 measurements for mRNA levels of *dILP 2, 3* and *5* from whole larvae. Transcript levels for each gene  
877 were normalized to the mRNA levels of *rp49* in the same sample. D. qPCR measurements for *dInR*.  
878 Transcript levels for each gene were normalized to the mRNA levels of *rp49* in the same sample E(i).  
879 Confocal z-projections showing immunostaining for dILP2 in larval IPCs, Scale: 50  $\mu\text{m}$ . E(ii).  
880 Quantification of dILP2 staining intensity in the third instar wandering larval brains. Whiskers in  
881 the box plots represent minimum and maximum values, with a line at the median. Numbers inside  
882 the parentheses below the plots indicate the no. of biological replicates used for the measurement.  
883 *Mann Whitney test* used for statistical analysis of the distributions. \**p-value* < 0.05, \*\**p-value* < 0.01.  
884 Genotypes: A-D. *tGPH* and *tGPH*; *dPIP4K<sup>29</sup>*. E. *ROR* and *dPIP4K<sup>29</sup>*.

885

886 **Fig. 3. Increased sensitivity of *Drosophila* larval cells to insulin upon loss of dPIP4K.**

887 A(i). Confocal z-projections showing levels and localization of the PIP<sub>3</sub> probe in control and  
888 *dPIP4K<sup>29</sup>* in salivary glands cells stimulated with 10  $\mu\text{M}$  insulin for 10 min and in A(ii), quantification  
889 of PIP<sub>3</sub> levels between control and *dPIP4K<sup>29</sup>* salivary glands from the same set of experiments.  
890 Immunoblot (from wandering third instar stage) showing a reduction in levels of dPIP4K protein in  
891 salivary gland lysates upon knockdown of dPIP4K using *AB1GAL4*. B(ii). Relative quantification of  
892 PIP<sub>3</sub> levels using the GFP-PH-GRP1 probe between control and *dPIP4K*-knockdown salivary glands  
893 C(i). Confocal z-projections of fat body lobes expressing PIP<sub>3</sub> binding probe from control and  
894 *dPIP4K<sup>29</sup>* late third instar larvae stimulated with 0.1  $\mu\text{M}$ , 1  $\mu\text{M}$  and 10  $\mu\text{M}$  insulin post 2 hr starvation.  
895 C(ii). Quantification of PIP<sub>3</sub> for experiments in fig. C (50 cells from at least 3 samples in the fat body  
896 for each genotype and treatment used for analysis). Scale: 50  $\mu\text{m}$ . C(iii). Comparison of mean fold

897 change (mutant w.r.t control) in response to insulin computed from data in B(ii). Comparison of  
898 PIP<sub>3</sub> levels between (D) mutant and rescue salivary glands and (E) wildtype and salivary glands  
899 overexpressing dPIP<sub>4</sub>K. Whiskers in the box plots represent minimum and maximum values, with  
900 a line at the median. Numbers inside the parentheses below the plots indicate the no. of biological  
901 replicates used for the measurement. Scale: 50 μM. *Mann Whitney test* used for statistical analysis  
902 of the distributions. \**p-value* < 0.05, \*\**p-value* < 0.01, \*\*\**p-value* < 0.001 Genotypes: A, C. *tGPH* and  
903 *tGPH; dPIP<sub>4</sub>K<sup>29</sup>*. B. *AB1Gal4, tGPH/+ and dPIP<sub>4</sub>K<sup>RNAi/+</sup>; AB1Gal4, tGPH/+*. D. *AB1Gal4, tGPH/+;*  
904 *dPIP<sub>4</sub>K<sup>29</sup>* and *UAS-dPIP<sub>4</sub>K/+; AB1Gal4, tGPH/+; dPIP<sub>4</sub>K<sup>29</sup>*. E. *AB1Gal4, tGPH/+ and UAS-*  
905 *dPIP<sub>4</sub>K/+; AB1Gal4, tGPH/+*.

906

907 **Fig. 4. Quantitative biochemical measurements of PIP<sub>3</sub> identify dPIP<sub>4</sub>K as a negative regulator of**  
908 **insulin signalling.**

909 A. Schematic outline of the steps involved in LCMS-based measurement of PIP<sub>3</sub> lipid from larvae  
910 and cells upon insulin stimulation. B(i). Measurement of total PIP<sub>3</sub> levels in whole larval lipid  
911 extracts from wildtype (*ROR*) and *dPIP<sub>4</sub>K<sup>29</sup>* using LCMS. B(ii). Levels of various larval PIP<sub>3</sub> species  
912 in wildtype (*ROR*) and *dPIP<sub>4</sub>K<sup>29</sup>* whole larval lipid extracts. C(i). Measurement of total PIP<sub>3</sub> levels  
913 using LCMS in whole cell lipid extracts from S2R+ cells treated with indicated dsRNAs. C(ii). Levels  
914 of various larval PIP<sub>3</sub> species in whole cell lipid extracts from S2R+ cells. The graphs show mean PIP<sub>3</sub>  
915 levels (normalized to spiked internal standards and total organic lipid phosphates recovered). Error  
916 bars depict SD. Inset C(ii). Immunoblot showing the knockdown of dPIP<sub>4</sub>K in S2R+ cells using two  
917 different sets of dsRNAs. *Student's unpaired t-test* used for statistical analysis of the distributions. \**p-*  
918 *value* < 0.05. On each graph, numbers inside the parentheses indicate the no. of biological replicates  
919 used for the measurement.

920

921 Fig. 5. dPIP<sub>4</sub>K additionally regulates insulin signalling independent of TORC<sub>1</sub>-mediated negative  
922 feedback.

923 Scheme 1 and 2 depict the feedback regulation of insulin signalling by TORC<sub>1</sub> activity in OFF and  
924 ON state respectively. The font and arrow sizes are indicative of the extent of molecular activity. A-  
925 F. PIP<sub>3</sub> quantification – Salivary gland images showing the distribution of the PIP<sub>3</sub> binding probe  
926 GFP-PH-GRP1 in cells. The distribution was quantified as the ratio of probe fluorescence on the  
927 plasma membrane to that in the cytosol. In all these experiments, the genetic manipulation was  
928 restricted to the salivary glands using *AB1Gal4*. A, C, E. In a wildtype background, Downregulation  
929 of TOR signalling by RNAi for *Rheb* [A (i and ii)]. Upregulation of TOR signalling through  
930 overexpression of *Rheb* [C (i and ii)], knockdown of *Tsc* [E (i and ii)] B, D, F. In a *dPIP4K<sup>29</sup>*  
931 background, Downregulation of TOR signalling by RNAi for *Rheb* [B (i and ii)] Upregulation of  
932 TOR signalling through overexpression of *Rheb* [D (i and ii)], knockdown of *Tsc* [F (i and ii)]. Scale:  
933 50 µM. Whiskers in the box plots represent minimum and maximum values, with a line at the  
934 median. Numbers inside the parentheses below the plots indicate the no. of biological replicates used  
935 for the measurement. *Mann Whitney test* used for statistical analysis of the distributions. \**p-value* <  
936 0.05. \*\**p-value* <0.01. Genotypes: A. *AB1Gal4, tGPH/+ and AB1Gal4, tGPH/ UAS-Rheb<sup>RNAi</sup>*. B.  
937 *AB1Gal4, tGPH /+; dPIP4K<sup>29</sup> and AB1Gal4, tGPH/ UAS-Rheb<sup>RNAi</sup>; dPIP4K<sup>29</sup>*. C. *AB1Gal4, tGPH /+*  
938 *and UAS-dRheb/+; AB1Gal4, tGPH/+*. D. *AB1Gal4, tGPH/+; dPIP4K<sup>29</sup> and UAS-dRheb/+; AB1Gal4,*  
939 *tGPH/+; dPIP4K<sup>29</sup>*. E. *AB1Gal4, tGPH/+ and UAS-Tsc1<sup>RNAi</sup>/+; AB1Gal4, tGPH/+*. F. *AB1Gal4, tGPH*  
940 */+; dPIP4K<sup>29</sup> and UAS-Tsc1<sup>RNAi</sup>/+; AB1Gal4, tGPH/+; dPIP4K<sup>29</sup>*.

941

942 Fig. 6. PIP<sub>4</sub>K functions at the plasma membrane as a negative regulator of insulin receptor  
943 signalling

944 A. Schematic showing constructs that target dPIP<sub>4</sub>K to different subcellular compartments and the  
945 motifs used for targeting. B (i-iv). Representative confocal z-projections of S2R+ cells with act-GAL4



946 expressing various dPIP<sub>4</sub>K constructs (i) wildtype GFP-tagged dPIP<sub>4</sub>K (ii) plasma-membrane (PM)  
947 targeted mCherry-tagged dPIP<sub>4</sub>K (iii) mCherry tagged dPIP<sub>4</sub>K targeted to various intracellular  
948 membranes inclusive of ER, Golgi and endo-lysosomal system (iv) GFP-tagged dPIP<sub>4</sub>K targeted to  
949 the lysosome. C(i). Immunoblots from S2R<sup>+</sup> lysates showing the expression of indicated dPIP<sub>4</sub>K  
950 constructs that were used in the *in vitro* assay. C(ii). *In vitro* kinase assay from S2R<sup>+</sup> cell lysates  
951 showing the activity of different overexpressed dPIP<sub>4</sub>K constructs. PIP<sub>3</sub> measurement on insulin  
952 stimulation (10 μM) using the PH-GFP-GRP<sub>1</sub> probe D-F. in *dPIP<sub>4</sub>K<sup>29</sup>* salivary glands reconstituted  
953 with D. PM targeted dPIP<sub>4</sub>K, E. endo-membrane targeted dPIP<sub>4</sub>K, F. Lysosomal dPIP<sub>4</sub>K, G. upon  
954 overexpression of dPIP<sub>4</sub>K::mCherry<sup>CAAX</sup> in the salivary glands. Whiskers in the box plots represent  
955 minimum and maximum values, with a line at the median. Numbers inside the parentheses below  
956 the plots indicate the no. of biological replicates used for the measurement. *Mann Whitney test* used  
957 for statistical analysis of the distributions. \**p-value* < 0.05. \*\**p-value* < 0.01. H(i). Representative  
958 confocal z-projections of CHO-IR cells overexpressing GFP-PIP<sub>4</sub>K<sub>2</sub>B and PIP<sub>4</sub>K<sub>2</sub>B::mCherry-  
959 CAAX. H(ii). Immunoblots from CHO-IR cells expressing PIP<sub>4</sub>K<sub>2</sub>B constructs stimulated with 1  
960 μM insulin for 10 min. The values below the blots represent the mean pAKT/Total AKT ratio across  
961 three independent experiments. Genotypes: D. *AB1Gal4, tGPH/+ and AB1Gal4, tGPH/+; dPIP<sub>4</sub>K<sup>29</sup>*  
962 *and AB1Gal4, tGPH/dPIP<sub>4</sub>K::mCherryCAAX; dPIP<sub>4</sub>K<sup>29</sup>*. E. *AB1Gal4, tGPH/+ and AB1Gal4, tGPH*  
963 */+; dPIP<sub>4</sub>K<sup>29</sup> and AB1Gal4, tGPH /dPIP<sub>4</sub>K::mCherryEM; dPIP<sub>4</sub>K<sup>29</sup>*. F. *AB1Gal4, tGPH /+ and*  
964 *AB1Gal4, tGPH/+; dPIP<sub>4</sub>K<sup>29</sup> and AB1Gal4, tGPH /Lysosomal-dPIP<sub>4</sub>K::eGFP; dPIP<sub>4</sub>K<sup>29</sup>*.

965

966 **Fig. 7. dPIP<sub>4</sub>K influences PIP<sub>3</sub> turnover.**

967 (A(i)) Schematic of the reactions that determine PIP<sub>3</sub> turnover at the plasma membrane. Insulin  
968 stimulates PI<sub>3</sub>K activation. Wortmannin irreversibly inhibits PI<sub>3</sub>K activity. (A(ii)) Live imaging  
969 assay protocol to follow PIP<sub>3</sub> dynamics with three phases as depicted. (B(i)) A single trace from live  
970 imaging of salivary glands expressing GFP-PH-GRP<sub>1</sub> probe showing the changes in the plasma-

971 membrane to cytosolic ratio of the probe fluorescence over time. (B(ii)) Wortmannin addition  
972 (400nM) completely blocks insulin (10 $\mu$ M) induced PIP<sub>3</sub> production (B(iii)) DMSO (vehicle)  
973 addition does not reduce PIP<sub>3</sub> levels post-insulin (10 $\mu$ M) stimulation. (C) and (D) Comparison of  
974 average traces of GFP-PH-GRP1 fluorescence ratios from multiple imaging runs of *control*, *dPIP4K<sup>29</sup>*  
975 and *dPIP4K overexpression* salivary glands (N=7 for all genotypes). Error bars indicate SD. The two  
976 experiments were performed at different times, hence controls samples were repeated. (E(i) and (ii))  
977 Curves depict changes in slopes of fluorescence calculated by taking ratios of fluorescence from test  
978 genotypes to that in controls. The maximal difference is indicated alongside the graph. Genotypes:  
979 B(i-iii). *AB1Gal4, tGPH/+*. C. *AB1Gal4, tGPH/+* and *AB1Gal4, tGPH/+; dPIP4K<sup>29</sup>*. D. *AB1Gal4,*  
980 *tGPH/+* and *UAS-dPIP4K/+; AB1Gal4, tGPH/+*.

981

982 **Fig. 8. dPIP4K modulates the acquisition of insulin resistance upon high dietary sugar intake.**

983 A. The graph represents the mean percentage of pupariation (After egg laying, AEL) observed over  
984 time on indicated diets. Data collected from 3 independent batches of about 15-25 larvae per batch  
985 (for *ROR* and *dPIP4K<sup>29</sup>*). Error bars indicate SD. B. Mean hemolymph trehalose levels measured of  
986 hemolymph pooled from 5-8 larvae each per genotype (*ROR* and *dPIP4K<sup>29</sup>*). Whiskers in the box  
987 plots represent minimum and maximum values, with a line at the median. Numbers inside the  
988 parentheses below the plots indicate the no. of biological replicates used for the measurement. *Mann*  
989 *Whitney test* used for statistical analysis of the distributions. **\*\*p-value <0.01.** C. A model for  
990 regulation of PIP<sub>3</sub> levels by dPIP4K upon insulin stimulation. In wild-type cells, insulin-induced  
991 activation of the receptor triggers dPIP4K activity. This prevents PI5P elevation at plasma membrane  
992 and also initiates events that prevent sustained Class I PI3K activity and PIP<sub>3</sub> production. Eventually,  
993 the negative feedback via TORC1 activity also sets in. These events act together and keep PIP<sub>3</sub> levels  
994 in check. Upon loss of dPIP4K in cells, PI5P accumulates. Class I PI3K shows has a sustained activity

995 resulting increased PIP<sub>3</sub> levels upon insulin stimulation which cannot be completely restored via  
996 TORC1-mediated negative feedback.

997

### 998 **Supplementary Figure Legends:**

999 **Fig. S1. Modulatory effect of dPIP<sub>4</sub>K on insulin signalling in regulation of cell size**

1000 A-G. Representative confocal sections of salivary glands of wandering third instar larvae labelled  
1001 with BODIPY FL 488 (green) and TOTO<sub>3</sub> (red) to mark the nuclei. Scale: 50 µm. Genotypes: A.  
1002 *AB1Gal4/+ and AB1Gal4/+; UAS-dINR<sup>RNAi</sup>*. B. *AB1Gal4/+ and UAS-dINR/+; AB1Gal4/+*. C.  
1003 *AB1Gal4/+; dPIP4K<sup>29</sup> and UAS-dINR/+; AB1Gal4/+; dPIP4K<sup>29</sup>*. D. *AB1Gal4/+ and UAS-Chico/+;*  
1004 *AB1Gal4/+*. E. *AB1Gal4/+; dPIP4K<sup>29</sup> and UAS-Chico/+; AB1Gal4/+; dPIP4K<sup>29</sup>*. F. *AB1Gal4/+ and*  
1005 *UAS-PDK<sup>A467V</sup>/+; AB1Gal4/+*. G. *AB1Gal4/+; dPIP4K<sup>29</sup> and UAS-PDK<sup>A467V</sup>; AB1Gal4; dPIP4K<sup>29</sup>*.

1006

### 1007 **Fig. S2. Standardisation of PIP<sub>3</sub> measurement using LCMS**

1008 A. Linearity of mass spectrometer response for increasing amounts of PIP<sub>3</sub> standard (17:0,  
1009 20:4) injected. Each point on the curve indicates the mean ± SD of three replicate injections.

1010 B. Chromatograms showing the elution profiles and retention times for various PIP<sub>3</sub> species  
1011 detected from whole larval lipid extracts of wildtype larvae stimulated *ex-vivo* with 100 µM  
1012 insulin for 10 min. Note the changing retention times with increase in no. of double bonds  
1013 and increase in length of acyl chains. Increase in double bonds for a fixed acyl chain length  
1014 results in earlier elution. Increase in length of acyl chain delays elution.

1015

### 1016 **Fig. S3. Biochemical measurement of PIP<sub>3</sub> from larval extracts using LCMS.**

1017 A. Relative abundance of various PIP<sub>3</sub> species in whole larval lipid extracts of wildtype larvae  
1018 stimulated *ex-vivo* with 100 µM insulin for 10 min. B. An experiment showing changes in

1019 the levels of various PIP<sub>3</sub> species upon insulin stimulation (100 μM, 10 min). C(i).  
1020 Immunoblot from whole larval lysates showing reduction in levels of dPIP<sub>4</sub>K protein upon  
1021 pan-larval RNAi for dPIP<sub>4</sub>K (*UAS-dPIP<sub>4</sub>K<sup>RNAi</sup>/+*; *daGAL4/+*). C(ii). Total levels of PIP<sub>3</sub> in  
1022 whole larval control and *dPIP<sub>4</sub>K<sup>RNAi</sup>* lipid extracts C(iii). Levels of various larval PIP<sub>3</sub> species  
1023 in whole larval control and *dPIP<sub>4</sub>K<sup>RNAi</sup>* lipid extracts. Total PIP<sub>3</sub> levels (D(i)) and levels of  
1024 individual species (D(ii)) in GAL4-control (*daGAL4/+*), GAL4-control in *dPIP<sub>4</sub>K<sup>29</sup>*  
1025 background (*daGAL4/+*; *dPIP<sub>4</sub>K<sup>29</sup>*) and pan-larval rescue (*daGAL4/UAS-dPIP<sub>4</sub>K::eGFP*;  
1026 *dPIP<sub>4</sub>K<sup>29</sup>*) lipid extracts. The graphs show mean PIP<sub>3</sub> levels (normalized to spiked internal  
1027 standards and total lipid phosphates recovered). Error bars depict SD. On each panel,  
1028 numbers inside the parentheses indicate the no. of biological replicates used for the  
1029 measurement.

1030

1031 **Fig. S4. PIP<sub>3</sub> measurement with increasing time of insulin stimulation**

1032 A(i). Confocal z-projections of salivary glands expressing GFP-PH-GRP1 in wildtype and  
1033 *dPIP<sub>4</sub>K<sup>29</sup>* backgrounds. Salivary glands dissected from wandering 3 rd instar larvae were  
1034 stimulated or not with 10 μM bovine insulin for indicated times, fixed and imaged. A(ii).  
1035 Relative PIP<sub>3</sub> levels were measured as a ratio of mean fluorescence intensity at the plasma  
1036 membrane to that in the cytosol. Whiskers in the box plots represent minimum and maximum  
1037 values, with a line at the median. Numbers inside the parentheses below the plots indicate the no. of  
1038 biological replicates used for the measurement. *Mann Whitney test* used for statistical analysis of the  
1039 distributions. \*\**p-value* < 0.01, \*\*\**p-value* < 0.001. Genotypes: *AB1Gal4, tGPH/+* and *AB1Gal4,*  
1040 *tGPH/+; dPIP<sub>4</sub>K<sup>29</sup>*

1041

1042 **Fig. S5. TORC1 activity regulates cell size in salivary glands.**

1043 Cell size measurements in salivary glands upon (A) Knockdown of Rheb (B) overexpression  
1044 of dRheb (C) Knockdown of TSC in *wildtype* and *dPIP4K<sup>29</sup>* backgrounds. Whiskers in the  
1045 box plots represent minimum and maximum values, with a line at the median. Numbers  
1046 inside the parentheses below the plots indicate the no. of biological replicates used for the  
1047 measurement. *Mann Whitney test* used for statistical analysis of the distributions. \*\**p-value*  
1048 <0.01, \*\*\**p-value* <0.001. Genotypes: A(i). *AB1Gal4/+ and AB1Gal4/UAS-Rheb<sup>RNAi</sup>* and (ii).  
1049 *AB1Gal4/+; dPIP4K<sup>29</sup> and AB1Gal4/UAS-Rheb<sup>RNAi</sup>; dPIP4K<sup>29</sup>* B(i). *AB1Gal4/+ and UAS-dRheb/+;*  
1050 *AB1Gal4/+ and (ii). AB1Gal4/+; dPIP4K<sup>29</sup> and UAS-dRheb/+; AB1Gal4/+; dPIP4K<sup>29</sup>.* C(i).  
1051 *AB1Gal4/+ and UAS-Tsc1<sup>RNAi</sup>/+; AB1Gal4/+ and (ii). AB1Gal4/+; dPIP4K<sup>29</sup> and UAS-Tsc1<sup>RNAi</sup>/+;*  
1052 *AB1Gal4/+; dPIP4K<sup>29</sup>.* Controls for A(ii) and C(ii) represent values from the same dataset.

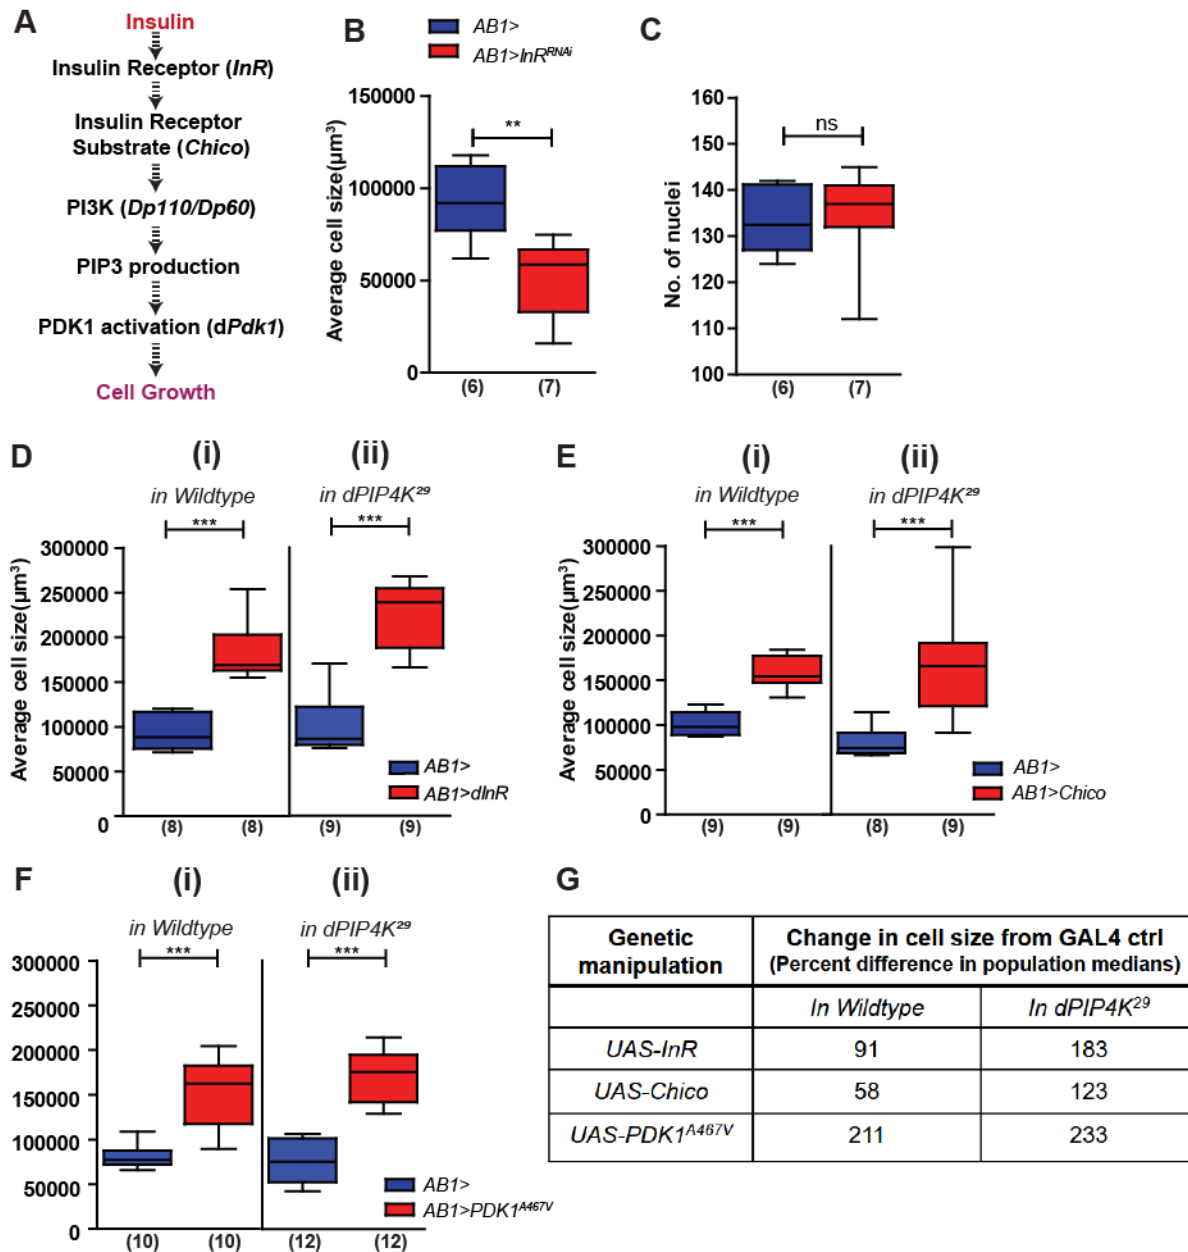

Sharma, et.al. Fig. 1

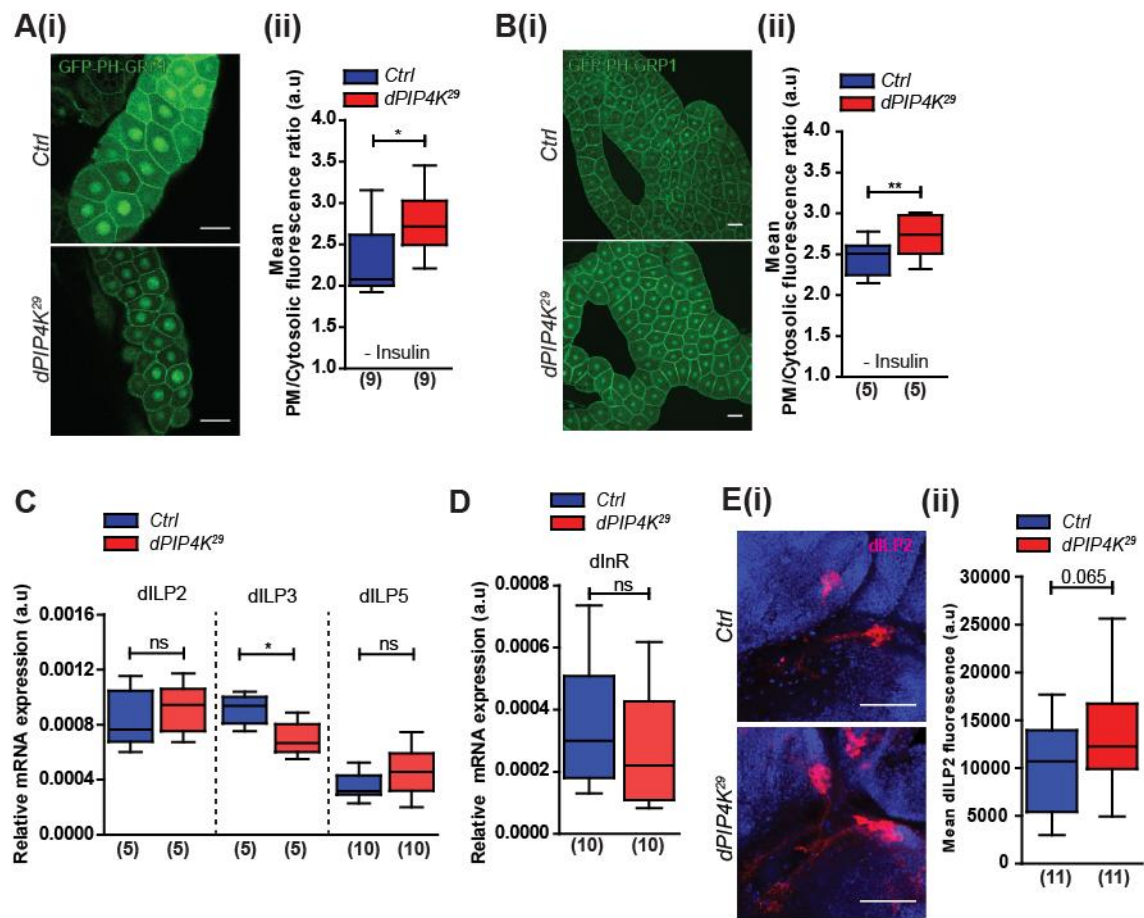

Sharma, et.al. Fig. 2

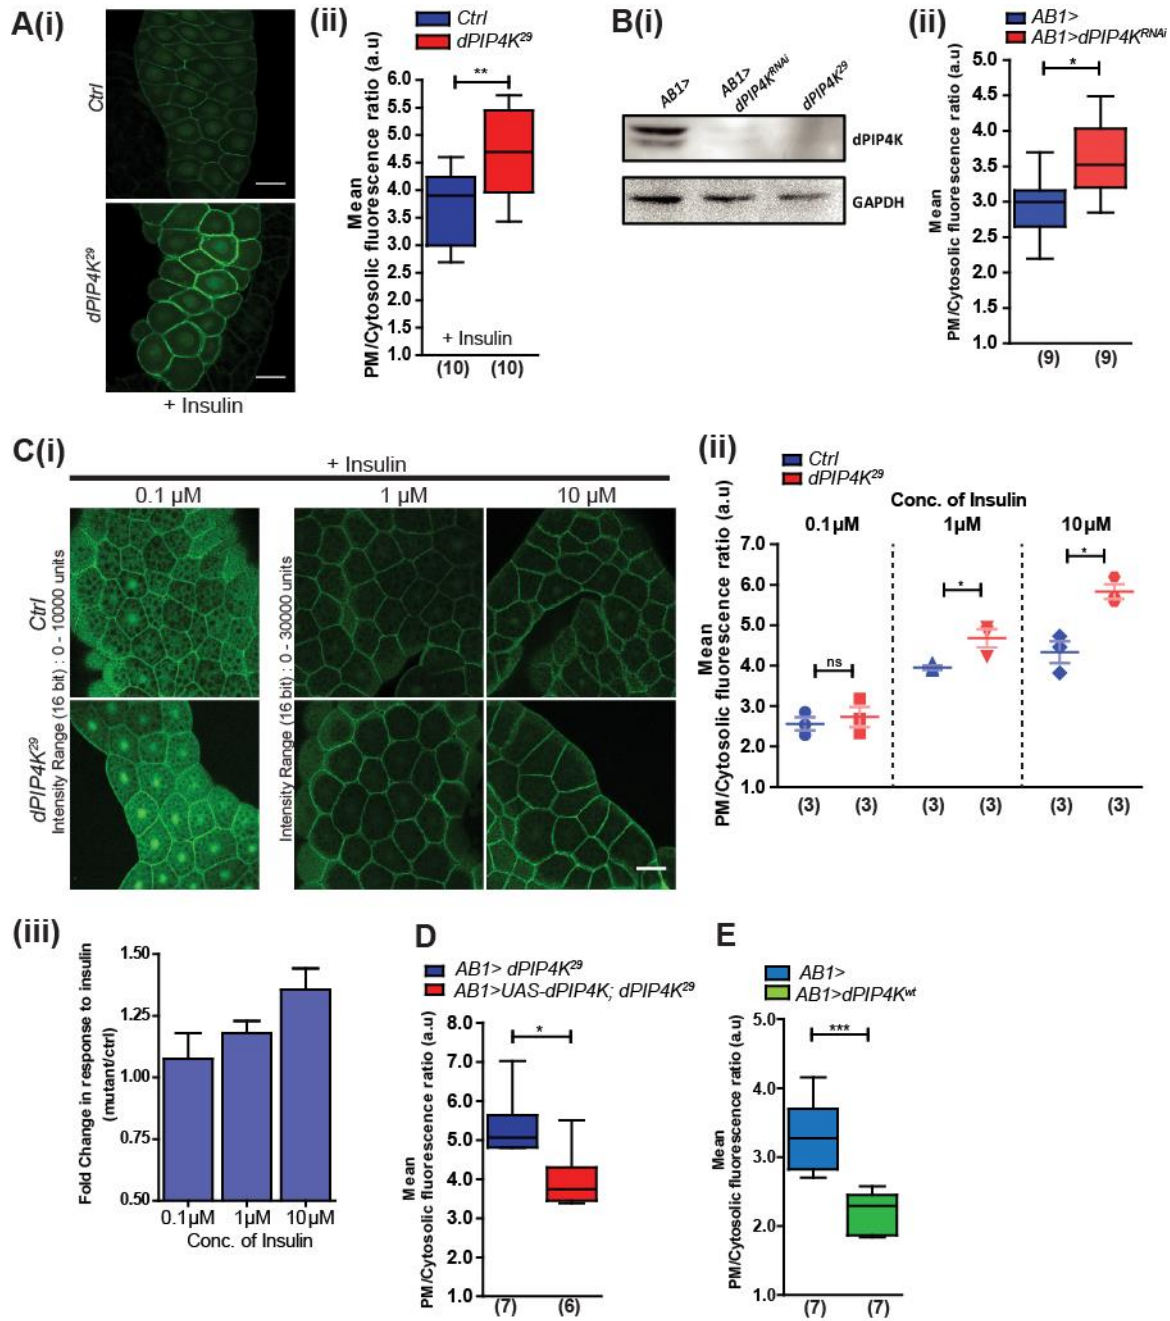

Sharma, et.al. Fig. 3



## A Biochemical Measurement of PIP<sub>3</sub>

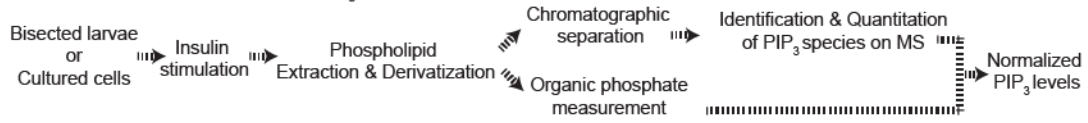

## B(i)

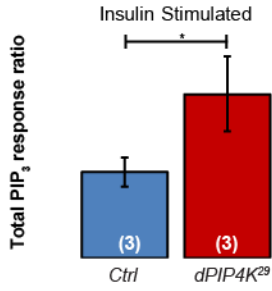

## (ii)

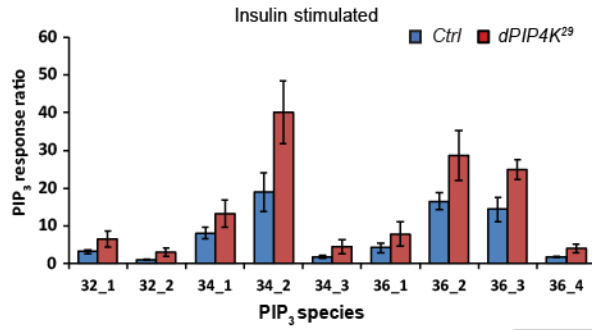

## C(i)

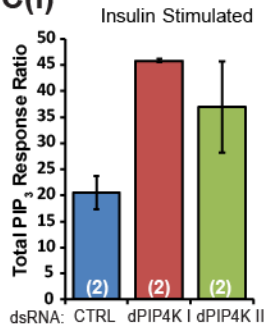

## (ii)

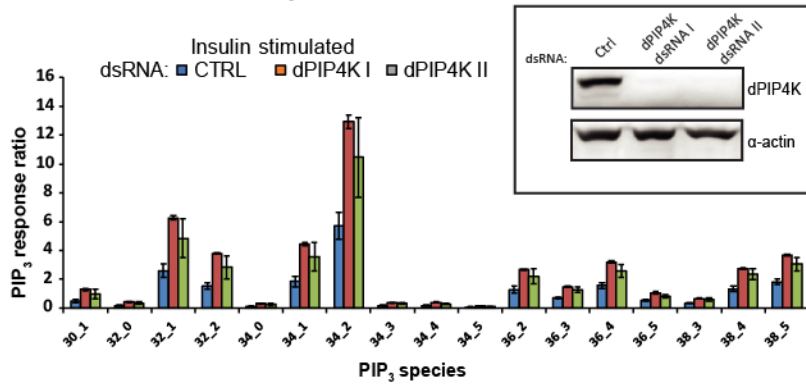

**Scheme 1 - Negative Feedback OFF:**

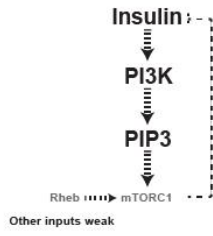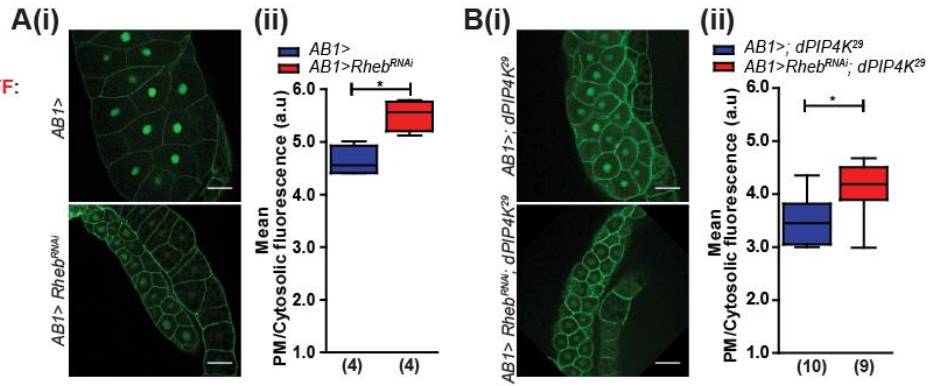

**Scheme 2 - Negative Feedback ON:**

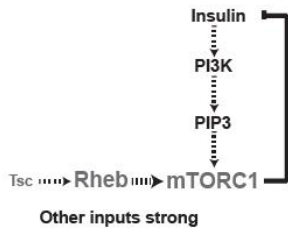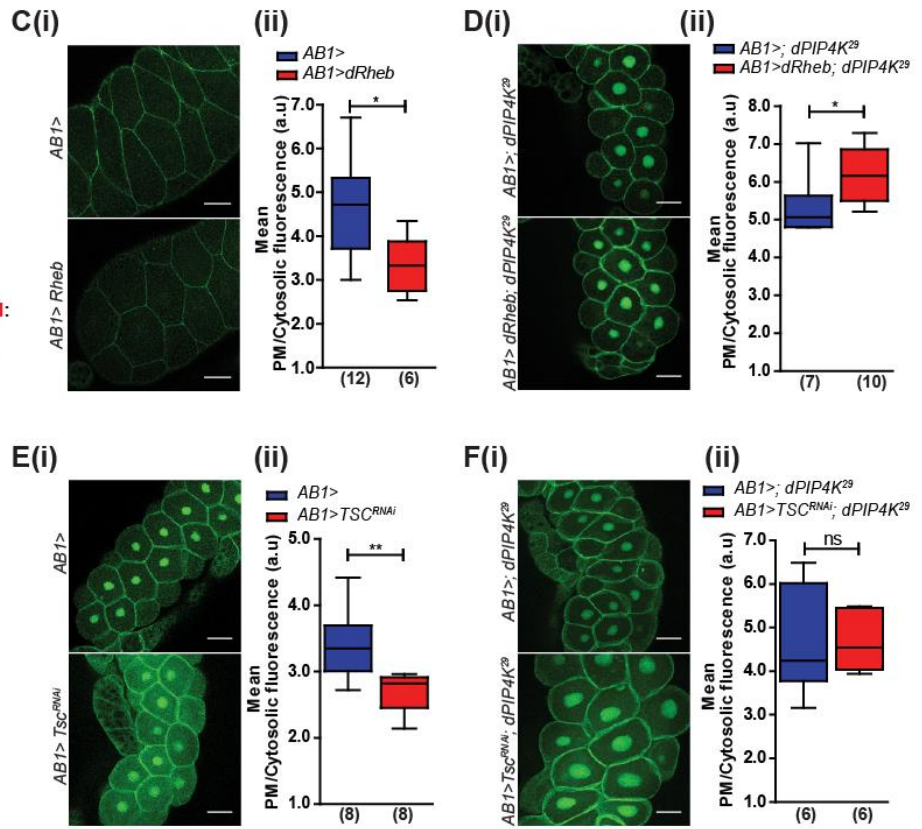

Sharma, et.al. Fig. 5

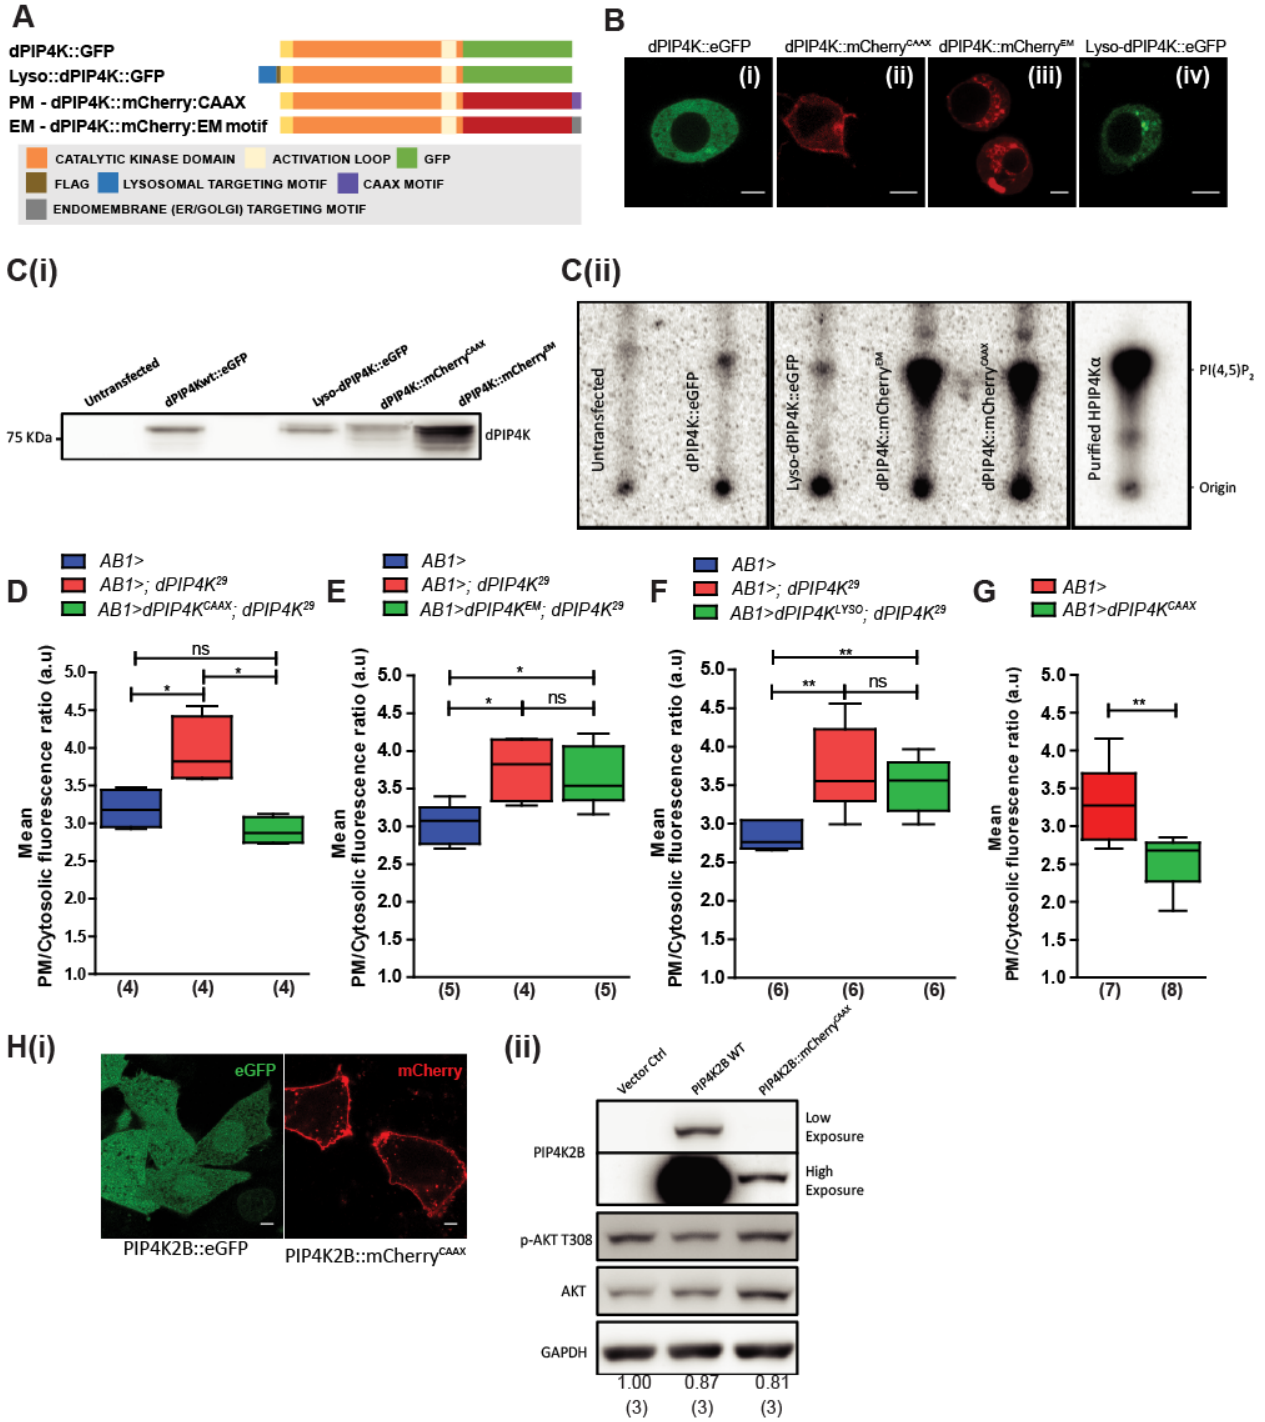

Sharma, et.al. Fig. 6

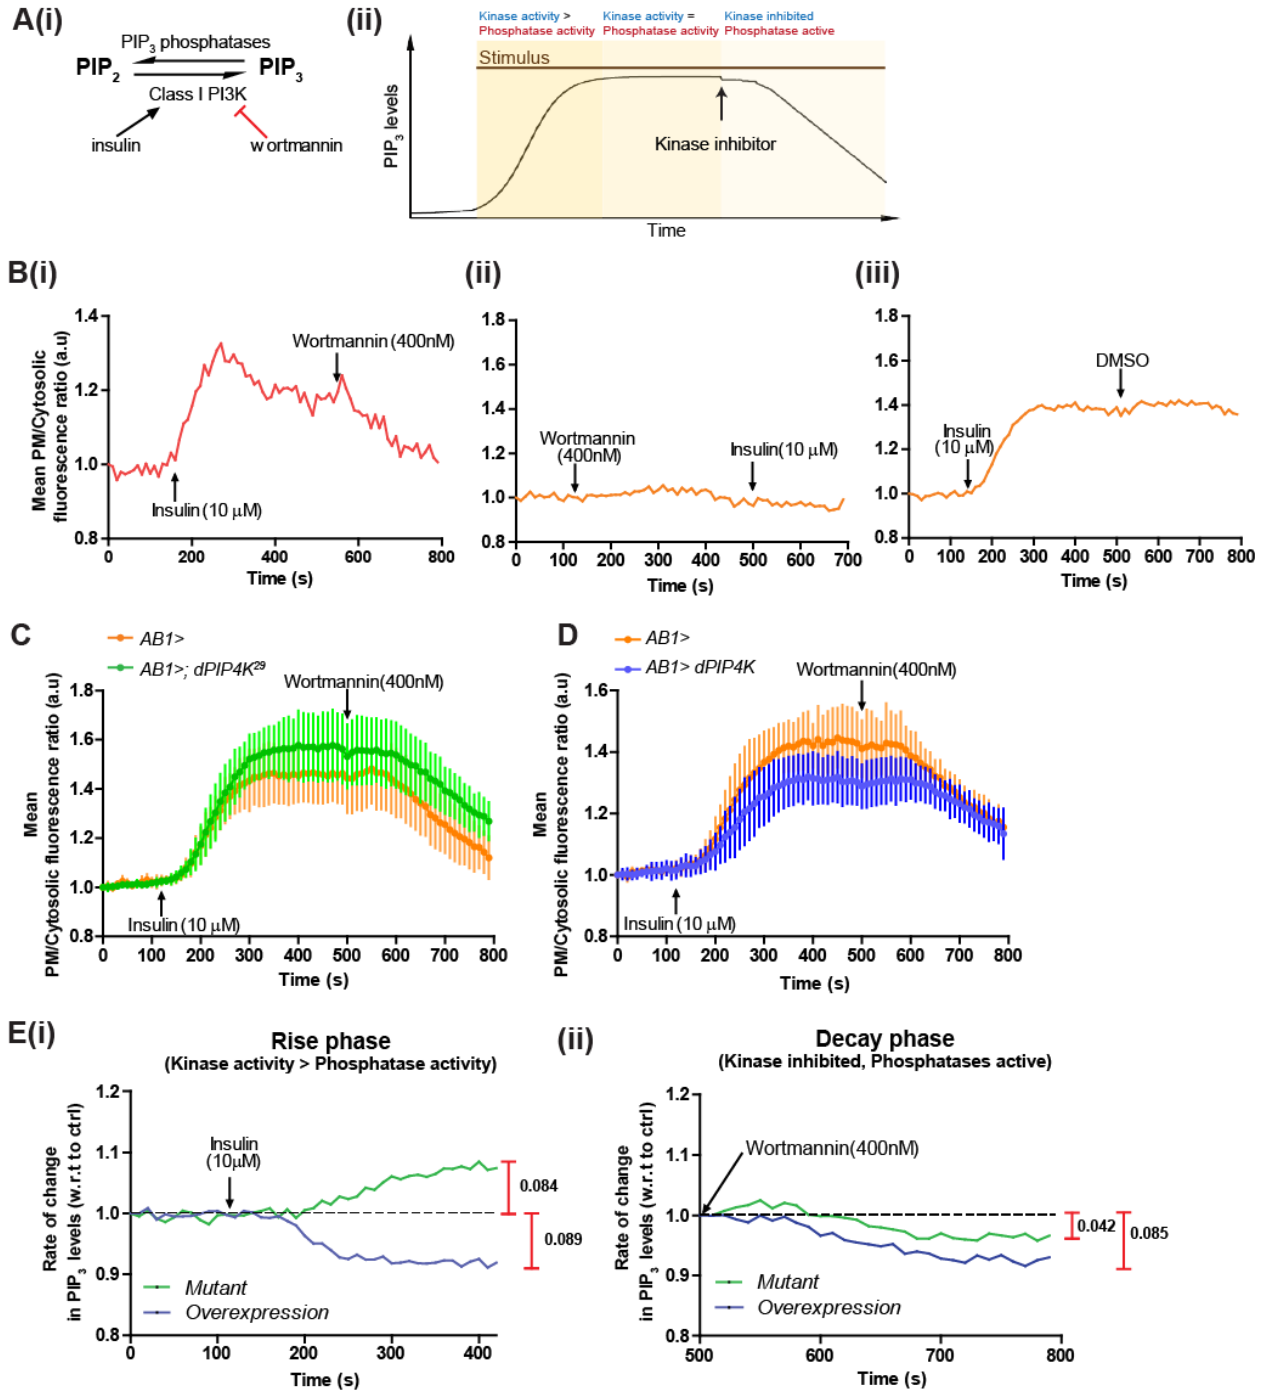

Sharma, et.al. Fig. 7

**A**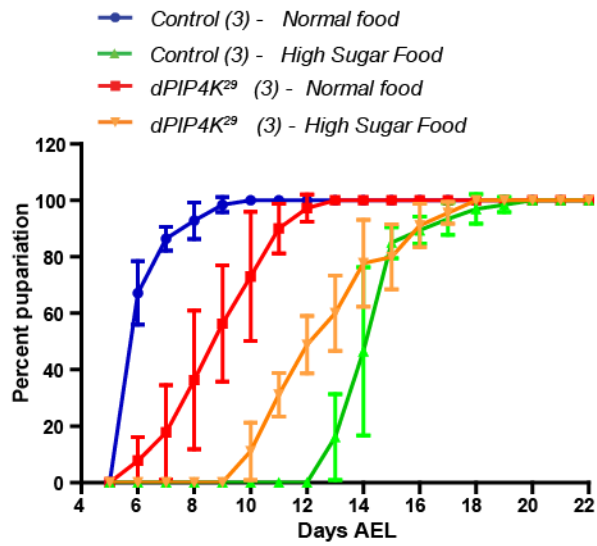**B**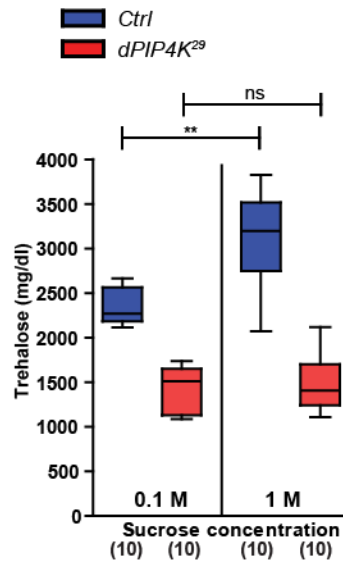**C**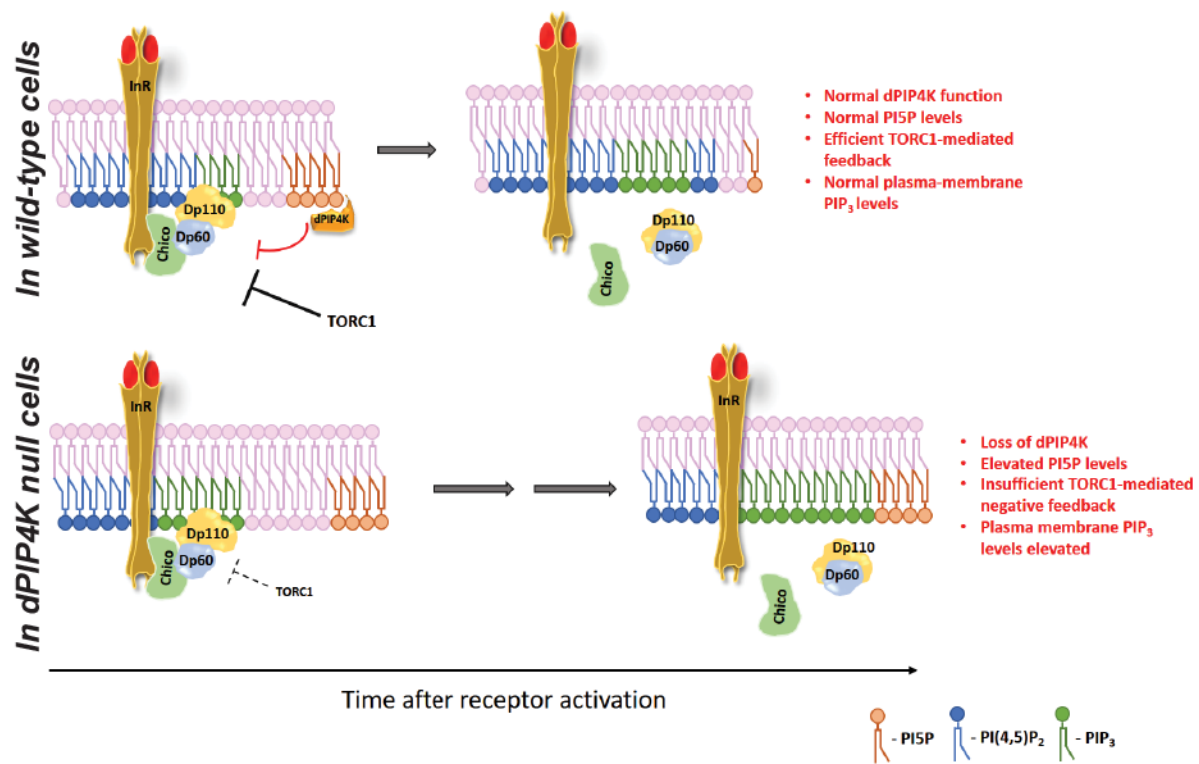

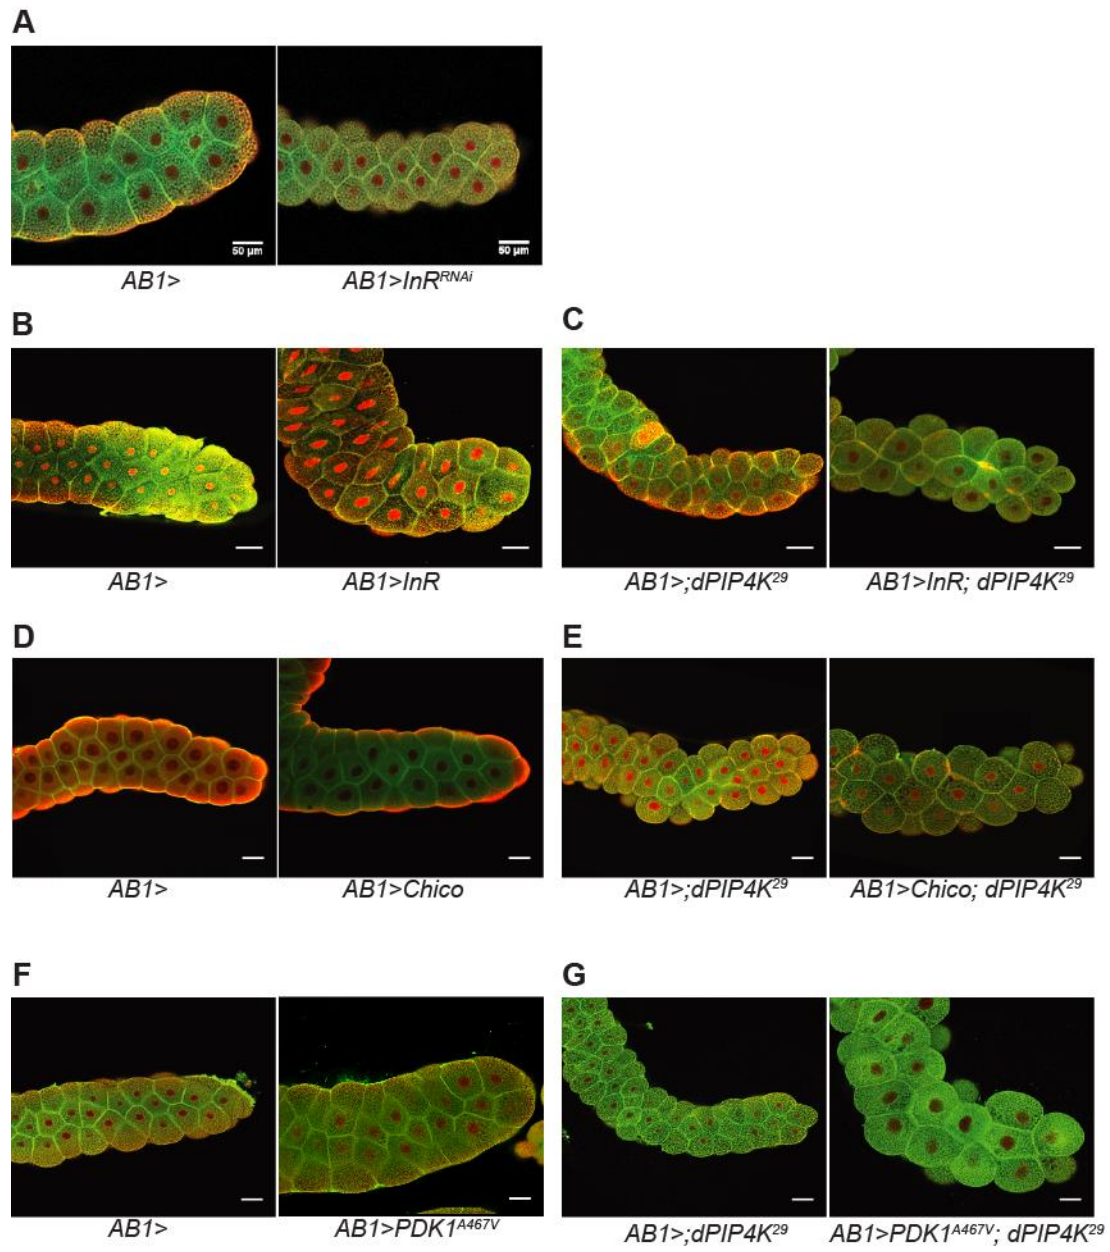

Sharma, et.al. Supplementary Fig. 1 (S1)

**A**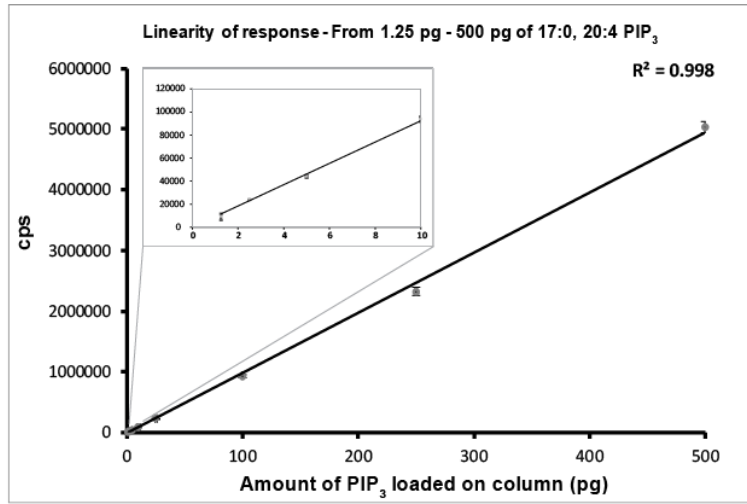**B**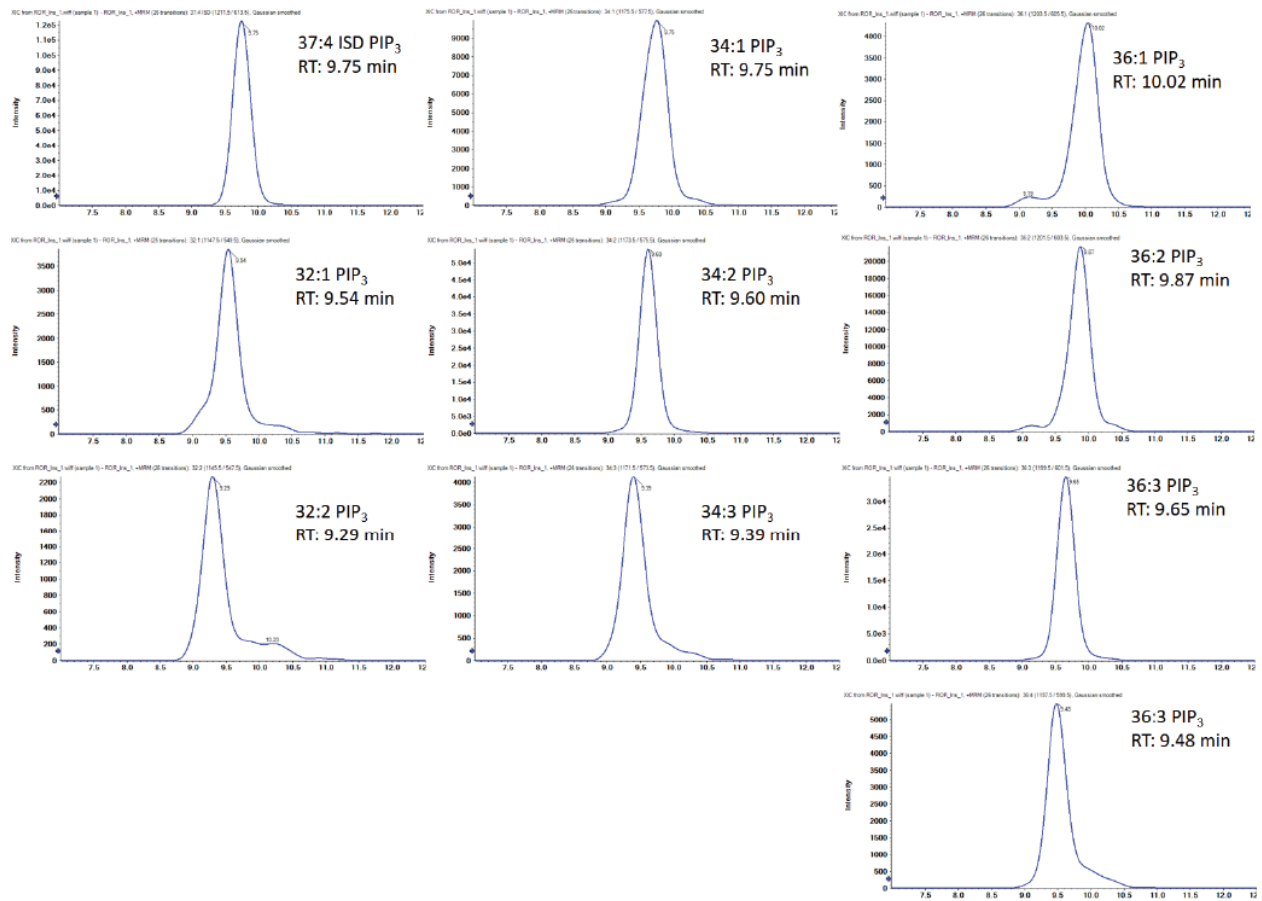

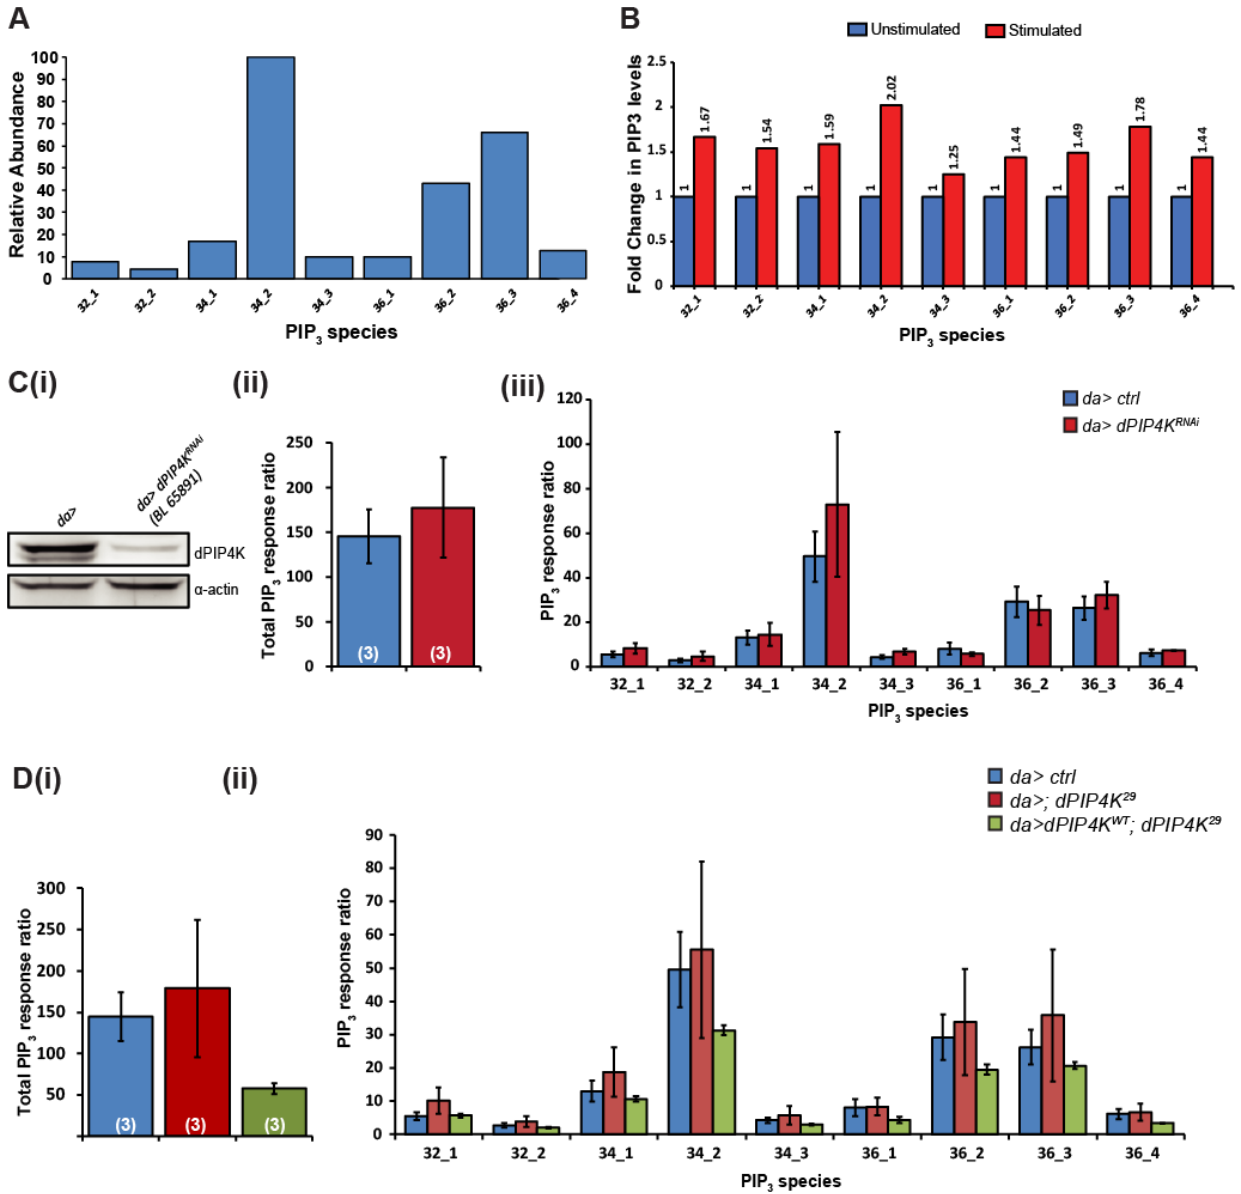



(i)

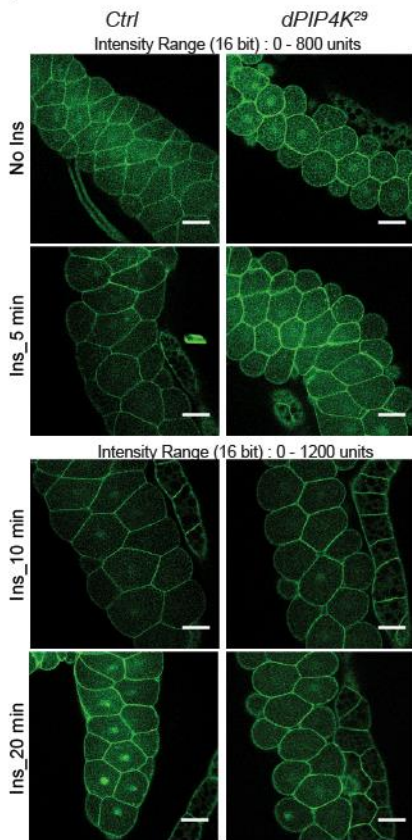

(ii)

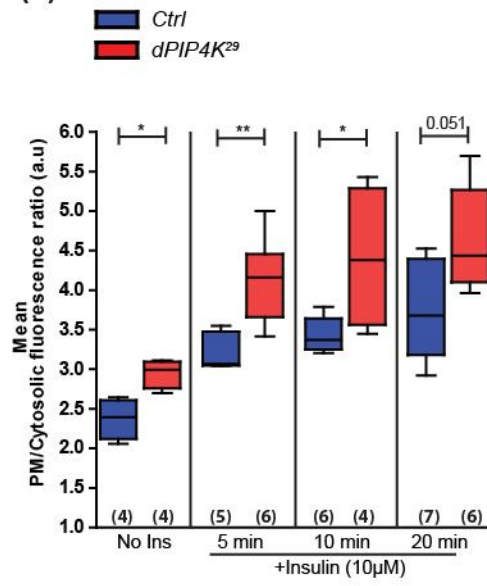

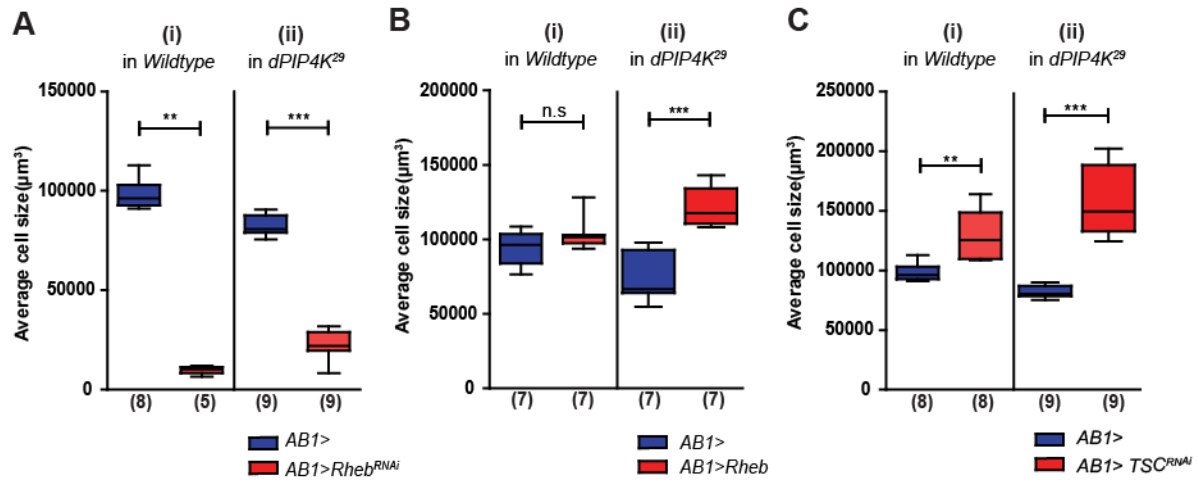

Sharma, et.al. Supplementary Fig. 5 (S5)
